1 **Human blood exposure to *Clostridium perfringens* epsilon toxin may shed light on**  
2 **erythrocyte fragility during active multiple sclerosis**

3

4 K. Rashid Rumah,<sup>a#</sup> Olawale E. Eleso,<sup>a</sup> Vincent A. Fischetti<sup>a</sup>

5

6 <sup>a</sup>The Laboratory of Bacterial Pathogenesis and Immunology, The Rockefeller University,  
7 New York, New York, United States of America

8

9 Running Head: *C. perfringens* ETX is hemolytic to human RBCs

10

11 #Address correspondence to K. Rashid Rumah, [rrumah@rockefeller.edu](mailto:rrumah@rockefeller.edu)

12

13 Abstract: 250 words

14 Text: 3,573

15

16

17

18

19

20

21 **ABSTRACT**

22 During active multiple sclerosis (MS), red blood cells (RBCs) harvested from patients  
23 reportedly display increased osmotic fragility and increased cellular volume  
24 (macrocytosis). The cause of these abnormalities remains unknown. We have previously  
25 proposed that *Clostridium perfringens* epsilon toxin (ETX) may be a blood-borne trigger  
26 for newly forming MS lesions based on its tropism for blood-brain barrier vasculature  
27 and CNS myelin. Recently, Gao et al. have reported that ETX binds to and damages  
28 human RBCs, leading to hemolysis. Moreover, the authors suggest that purinergic  
29 nucleotide (P2) receptor activation amplifies the hemolytic process. Here, we confirm  
30 that ETX indeed causes human-specific RBC lysis. However, our data suggest that the  
31 hemolytic process is mediated by metal-catalyzed oxidation of the swell-induced,  
32 nucleotide-sensitive ICln chloride channel. We use spectrophotometry, flow cytometry  
33 and Western blotting to show that ETX targets human RBCs and T lymphocytes via their  
34 shared expression of Myelin and Lymphocyte protein (MAL); a protein shown to be both  
35 necessary and sufficient for ETX binding and toxicity. ETX likely triggers T cells to  
36 release redox-active heavy metals,  $\text{Cu}^+$  and  $\text{Fe}^{3+}$ , via the lysosomal exocytosis pathway,  
37 while RBCs likely release these heavy metals via ETX pore formation within the RBC  
38 membrane. Extracellular  $\text{Cu}^+$  and  $\text{Fe}^{3+}$  may then amplify hemolysis by oxidizing a  
39 previously identified heavy metal-binding site within the ICln channel pore, thus  
40 deregulating its normal conductance. Elucidating the precise mechanism of ETX-  
41 mediated hemolysis may shed light on the underlying etiology of MS, as it would explain  
42 why MS RBC abnormalities occur during active disease.

43

44 **IMPORTANCE**

45 During active MS, numerous reports suggest that circulating RBCs are larger than normal  
46 and fragment more easily. The exact trigger(s) for these RBC abnormalities and for  
47 newly forming MS lesions remains unidentified. We have proposed that ETX, secreted  
48 by the gut bacterium *Clostridium perfringens*, may be an environmental trigger for newly  
49 forming MS lesions. Indeed, ETX has been shown to breakdown the BBB, enter the  
50 brain and damage the myelin sheath. Because ETX is typically spread through the  
51 circulatory system, we wished to determine how the toxin affects human blood.  
52 Provocatively, there has been a recent report that ETX produces cellular abnormalities in  
53 human RBCs, reminiscent of what has been described during active MS. In our study,  
54 we sought to elucidate the precise mechanism for how ETX causes RBC damage. In  
55 addition to triggering BBB breakdown and CNS demyelination, ETX might also explain  
56 why RBCs appear abnormal during MS attacks.

57

58 **INTRODUCTION**

59 Although typically considered a disease confined to the central nervous system (CNS),  
60 multiple sclerosis (MS) has frequently been shown to cause hematologic abnormalities.  
61 To our knowledge, Waksman provided the lone report of T-lymphocyte abnormalities  
62 during active MS, which entailed cellular enlargement and a decline in circulating T cell  
63 numbers [1]. However, there have been numerous reports of red blood cell (RBC)  
64 abnormalities during, and up to one week prior to the onset of neurologic symptoms [2-  
65 7]. These decades-old RBC studies have described increased RBC volume  
66 (macrocytosis) and increased osmotic fragility, which makes hemolysis more likely to

67 occur. Interestingly, Lewin et al. have recently shed additional light on MS-related RBC  
68 abnormalities by showing that free hemoglobin, presumably released after hemolysis,  
69 correlates with iron deposition along CNS blood vessels. Iron deposition may lead to  
70 neuronal toxicity, axonal loss and the progression from relapsing-remitting MS (RRMS)  
71 to secondary-progressive MS (SPMS) [8]. Despite the possible relevance to how MS  
72 fundamentally progresses, these hematologic abnormalities remain unexplained.

73

74 We have previously suggested that newly forming MS lesions may be triggered by a gut-  
75 derived neurotoxin, *Clostridium perfringens* epsilon toxin (ETX), which is disseminated  
76 via the circulatory system [9-12]. In support of this theory, Wagley et al. have recently  
77 identified serological evidence of prior ETX exposure in MS patients from the United  
78 Kingdom [13], complementing what we have observed in an American cohort [9].

79

80 *C. perfringens* is an anaerobic, spore-forming, gram-positive bacillus that is sub-  
81 classified into seven distinct toxinotypes (A-G) based on differential exotoxin production  
82 [14]. *C. perfringens* type A typically colonizes the human gut with a prevalence of 63%  
83 among healthy individuals [15], while *C. perfringens* types B and D, the producers of  
84 ETX, are commonly found in the intestines of ruminant animals such as sheep, goats, and  
85 cattle but rarely in humans [16]. ETX is a potent neurotoxin secreted as a 33 kDa  
86 inactive precursor during the logarithmic growth phase of *C. perfringens* in the  
87 mammalian intestine. This poorly active precursor is cleaved by gut trypsin,  
88 chymotrypsin and several other carboxypeptidases [17]. The ~27 kDa ETX cleavage  
89 product permeabilizes the gut epithelium, enters the blood stream and binds to receptors

90 on the luminal surface of brain endothelial cells [9,16]. Once bound to brain  
91 microvessels, ETX oligomerizes and forms a heptameric pore in the endothelial cell  
92 plasma membrane. Brain endothelial cell damage leads to breakdown of the BBB [16].  
93 In addition to its known effects on BBB vasculature, ETX has been found to specifically  
94 bind to and damage myelin when incubated with mammalian brain slices [11, 18, 19].  
95 This unique ability to interact specifically with the tissues that are damaged in MS, i.e.,  
96 the BBB and CNS myelin, makes ETX a promising candidate as an environmental MS  
97 trigger.

98

99 ETX binds to and damages cells that express the tetraspan transmembrane myelin and  
100 lymphocyte protein (MAL); relevant cell types containing MAL include the myelin-  
101 oligodendrocyte unit, blood-brain barrier endothelial cells and circulating CD4+ T-  
102 lymphocytes [10]. Intriguingly, Gao et al. have recently reported that ETX directly binds  
103 to the human RBC plasma membrane, matures into the ETX pore-complex and triggers  
104 dose-dependent hemolysis, while sparing RBCs from other species. Furthermore, they  
105 propose that ETX-mediated hemolysis is amplified by purinergic nucleotide (P2) receptor  
106 activation [20].

107

108 In this study, we confirm that ETX indeed binds to and damages human RBCs, likely due  
109 to their expression of MAL isoform C. However, our data point to a different nucleotide-  
110 sensitive system being responsible for amplifying hemolysis. We find that inhibitors of  
111 the nucleotide-sensitive, swell-induced chloride channel, ICLn, successfully inhibit the  
112 hemolytic process.

113

114 Because ETX has only recently garnered interest in its potential to cause human disease,  
115 there is a paucity of studies published on how it affects human blood. Gaining insight  
116 into how ETX triggers human RBC fragility may provide ancillary support for the ETX-  
117 MS hypothesis in light of the fact that MS-associated RBC abnormalities remain  
118 unexplained. Furthermore, if ETX is ultimately shown to be involved in triggering new  
119 MS lesions, understanding the precise mechanism of toxin-triggered hemolysis may open  
120 avenues for novel biomarkers capable of predicting the onset of neurologic symptoms, as  
121 RBC abnormalities have been shown to precede clinical relapse in some instances.  
122 Considering the recent report that hemolysis may play a critical role in the transition from  
123 RRMS to SPMS [8], elucidating how hemolysis occurs may allow for clinical  
124 interventions aimed at preventing disease progression and permanent neurological  
125 decline.

126

## 127 **RESULTS**

### 128 **Human blood is uniquely sensitive to ETX-mediated hemolysis via MAL expression**

129 We first attempted to repeat the finding by Gao et al. that ETX-mediated hemolysis is  
130 specific to human blood [20]. We compared the lytic effect of ETX on human blood vs.  
131 blood from ruminant animals such as sheep, goats and cows, as these animals are the  
132 natural hosts for ETX-secreting *C. perfringens* strains [16]. We also tested guinea pig  
133 blood as a non-human, non-ruminant control. Highly purified epsilon protoxin  
134 (protoETX), as determined by SDS-PAGE (Supplemental Fig 1) was trypsin activated,  
135 and time-course analysis showed that this activated ETX (15nM) caused hemolysis in

136 PBS-washed whole human blood. However, blood harvested from non-human species  
137 was completely refractory (Fig 1a). Importantly, we also determined that trypsin  
138 activation was necessary for hemolytic activity, as non-activated protoETX failed to  
139 trigger hemolysis (Supplemental Fig 2). Moreover, inhibition of activated ETX with an  
140 anti-ETX neutralizing antibody, JL008, inhibited hemolysis in a dose-dependent manner  
141 (Supplemental Fig 3). We also confirmed that ETX directly binds human RBCs by  
142 incubating cells harvested from human, rhesus macaque, sheep and rat with non-activated  
143 protoETX (50nM), which is capable of cellular binding, but is incapable of forming pores  
144 within the cell membrane [16]. We visualized human-specific ETX binding by flow  
145 cytometry using custom anti-ETX antibody, JL001.2 (Fig 1b).

146

147 Our previous work has shown that lipid raft protein, MAL (17 kDa, predicted), is both  
148 necessary and sufficient for ETX binding and toxicity, thus we sought to determine if  
149 human RBCs express MAL. Consistent with MAL's proposed role in ETX toxicity and  
150 with previously published RBC membrane proteomic analysis [21], we corroborated that  
151 human RBCs indeed express MAL; specifically a shortened isoform predicted to be  
152 11kDa, MAL isoform C (Fig 1c). RBCs from refractory species, cow and rat, were both  
153 negative for MAL expression. However, we cannot exclude the possibility that the  
154 recognition antibody used may be specific for human MAL. Interestingly, there seemed  
155 to be a trace expression of full length MAL (open arrowhead) in addition to the dominant  
156 band appearing for shortened MAL isoform C (closed arrowhead).

157

158

159 **P2 receptor agonists and antagonists both inhibit ETX-mediated hemolysis**

160 While assessing the possible involvement of the P2 purinergic nucleotide receptors in  
161 ETX-mediated hemolysis (as suggested by Gao et al.), we first exposed PBS-washed  
162 whole human blood to: i) the irreversible P2 receptor antagonist, oxidized ATP (oxATP);  
163 ii) P2 receptor agonists ATP and GTP and; iii) UMP, as a poorly interacting nucleotide  
164 control, before treatment with ETX [22]. Surprisingly, we found that both P2 agonists  
165 and P2 antagonists inhibited ETX-mediated hemolysis (Fig 2a). Furthermore, we found  
166 that overnight incubation with oxATP and subsequent washout of this irreversible P2  
167 inhibitor prior to ETX treatment largely abolished its anti-hemolytic effect (Fig 2b).  
168 These results led us to search for alternative pathways capable of amplifying ETX-  
169 mediated hemolysis in a nucleotide-sensitive fashion.

170

171 **O<sub>2</sub> and redox-active heavy metals, Cu<sup>+</sup> and Fe<sup>3+</sup>, are involved in ETX-mediated**  
172 **hemolysis**

173 A serendipitous finding, observed upon exposing ETX-treated blood to different  
174 experimental conditions, was that atmospheric oxygen is required for hemolysis. One  
175 concern was that anaerobiosis may be blocking a pathway crucial to ETX-mediated  
176 hemolysis that is dependent on the electron-transport chain and oxidative  
177 phosphorylation. To address this, we compared the hemolytic effect of ETX under  
178 aerobic, anaerobic and sodium azide (10mM) conditions. Sodium azide was used as an  
179 alternative method to inhibit oxidative phosphorylation in lieu of atmospheric oxygen  
180 depletion. The results revealed that ETX-mediated hemolysis was inhibited under



181 anaerobic conditions, but not by oxidative phosphorylation inhibition via sodium azide  
182 blockade (Fig 3a).  
183  
184 Considering the involvement of ambient O<sub>2</sub>, we explored various sources of cellular free-  
185 radical generation. A potent way for macromolecules to be specifically targeted and  
186 damaged in an oxygen-dependent manner is by metal-catalyzed oxidation, where redox-  
187 active transition metals coordinate with metal-binding amino acid residues, e.g., cysteine,  
188 histidine and methionine, and locally generate reactive oxygen species (ROS) [23].  
189 Along these lines, we pre-incubated ETX-treated human blood with the hydrophilic Cu<sup>+</sup>  
190 chelator, tris-hydroxypropyltriazolylmethylamine (THPTA) and the hydrophilic Fe<sup>3+</sup>  
191 chelator, deferoxamine (DFO), both of which significantly inhibited ETX-mediated  
192 hemolysis. In contrast, the Cu<sup>2+</sup> chelator, penicillamine (PncI), and the non-specific  
193 metal chelator, citrate, were not effective at inhibiting hemolysis (Fig 3b). As an  
194 alternative to “artificial” metal chelators, we also exposed ETX-treated blood to  
195 “endogenous” metal chelators, such as the heavy metal-coordinating amino acids,  
196 cysteine, histidine and methionine [24], each of which transiently inhibited ETX-  
197 mediated hemolysis, cysteine > histidine > methionine. However, the control amino  
198 acids, lysine, glutamate and glycine were significantly less effective (Fig 3c).  
199  
200 A metal-coordinating protein involved in how the RBC membrane interacts with  
201 liberated Cu<sup>+</sup> and Fe<sup>3+</sup> is likely to bind more than one metallic species, and with varying  
202 affinities. This notion led us to hypothesize that pretreatment of human blood with  
203 redox-silent transition metals, such as Ni<sup>2+</sup> and Mn<sup>2+</sup>, might protect RBCs from ETX-

204 mediated hemolysis by competing for crucial metal-binding sites on the RBC membrane.  
205 Indeed, we observed that both  $\text{Ni}^{2+}$  and  $\text{Mn}^{2+}$  significantly inhibited ETX-mediated  
206 hemolysis,  $\text{Ni}^{2+} > \text{Mn}^{2+}$ .  $\text{Ca}^{2+}$  also exhibited inhibitory properties, but to a lesser extent  
207 when compared to the redox-silent transition metals (Fig 3d).

208

209 **The heavy metal binding, nucleotide-sensitive ICln chloride channel amplifies ETX-**  
210 **mediated hemolysis**

211 The sensitivity of ETX-mediated hemolysis to the presence of nucleotides, ambient  
212 oxygen and the extracellular chelation of redox-active transition metals led us to search  
213 the literature for a surface molecule, which may be sensitive to these stimuli. We  
214 identified the ubiquitously expressed, outwardly-rectifying ICln chloride channel as a  
215 lead candidate. Under normal conditions, the ICln protein is found to be closely  
216 associated with the actin cytoskeleton abutting the inner leaflet of the plasma membrane  
217 [25]. Upon cellular swelling, as would be expected from ETX pore formation, ICln  
218 rapidly inserts into the plasma membrane forming a channel that causes intracellular  
219 chloride to flow out of the cell, against its diffusion gradient. This outward rectification  
220 allows the cell to decrease its volume, thus avoiding osmolysis [26]. Remarkably, a key  
221 histidine residue, His64, resides within the ICln pore. His64 coordinates with  $\text{Ni}^{2+}$  to  
222 alter ICln's normal conductance [27]. We hypothesize that this regulatory, heavy metal-  
223 binding residue may be the site at which redox-active  $\text{Cu}^+$  and  $\text{Fe}^{3+}$ , previously liberated  
224 by initial ETX pore formation, bind to and damage this volume-regulating channel. Of  
225 note, ICln also possesses distinct  $\text{Ca}^{2+}$  binding sites, located near the extracellular  
226 opening of the channel that allow for conductance inhibition by extracellular  $\text{Ca}^{2+}$  [27].

227

228 An alternate name for ICln is chloride channel nucleotide sensitive 1A (CLNS1A). As  
229 the name suggests, the presence of extracellular nucleotides also regulates ICln  
230 conductance, i.e., ATP and GTP inhibit ICln [28]. To further investigate ICln's potential  
231 role in ETX-mediated hemolysis, we tested other distinct classes of ICln inhibitors,  
232 namely the chromones (cromolyn and nedocromil) [29], and the cyclamate anion [30];  
233 each of which successfully inhibited ETX-mediated hemolysis (Figs 4a and 4b). We  
234 tested each class of ICln inhibitor in an aggregate experiment to provide a comparative  
235 analysis (Fig 4c). Please note that we omitted the anti-retroviral nucleoside analogue  
236 ICln inhibitors, acyclovir and AZT [31] due to poor solubility relative to the other ICln  
237 inhibitors. Interestingly, when we assessed RBC ICln expression via Western blot, we  
238 observed the occasional appearance of an ICln doublet (open arrowhead), consistent with  
239 what has been observed in previous studies [25]. However, the doublet did not correlate  
240 with changes in the ETX concentration (Fig 4d).

241

242 Because other pore-forming toxins that form similarly sized pores, e.g., *Staphylococcus*  
243 *aureus* alpha toxin, have been reported to cause hemolysis via P2 receptor amplification  
244 [32], we explored the possibility that ICln may also be a target for other toxins. Indeed,  
245 when we pre-incubated human blood with a large panel of ICln inhibitors and heavy  
246 metal chelators, we found that *S. aureus* alpha toxin also employed the ICln channel,  
247 similar to what we had observed for ETX (Fig 4e).

248

249

250 **T cell lysosomal exocytosis contributes to ETX-mediated hemolysis**

251 Because human T-lymphocytes also express MAL [33, 34], we also wanted to explore  
252 the possibility that T cells might contribute to ETX-mediated hemolysis. To assess  
253 possible leukocyte involvement, we compared the rate of ETX-mediated hemolysis in  
254 PBS-washed whole blood to that of PBS-washed RBCs that were leukocyte depleted (Fig  
255 5a). The slowed rate of ETX-mediated hemolysis in the case of leukocyte depletion  
256 prompted to us to confirm that MAL-expressing CD4<sup>+</sup> T cells do indeed bind ETX (Fig  
257 5b). In agreement with the literature, ETX binding suggests that human T cells express  
258 MAL, while non-malignant B cells do not [35].

259

260 Blanch et al. have recently determined that ETX forms pores in the membranes of a  
261 human T-lymphocyte cell line [36]. Moreover, they demonstrated that T-lymphocyte cell  
262 lines are sensitive to ETX toxicity, while B-lymphocyte cell lines are not. We wished to  
263 confirm that primary T cells are indeed susceptible to ETX. Therefore, we isolated CD3<sup>+</sup>  
264 T cells and exposed them to ETX (50nM) for 1 hour at 37°C and assessed cell death by  
265 propidium iodide (PI) uptake. Isolated CD20<sup>+</sup> B-lymphocytes were used as a control  
266 lymphocyte population. Results revealed that a subset of human T cells is sensitive to  
267 ETX-mediated damage, while human B cells are completely refractory (Fig 5c).

268

269 One way that nucleated cells can defend against pore-forming toxins is via lysosomal  
270 exocytosis [37, 38]. However, this pathway has been described for toxins that form  
271 relatively large pores (> 2nm in diameter) in the plasma membrane. For example,  
272 streptolysin O allows the influx of Ca<sup>2+</sup>, which then triggers the lysosomal exocytosis

273 pathway and lysosomal hydrolase-mediated membrane internalization and repair [37, 39].  
274 Toxins similar to ETX that form much smaller pores, such as *Staphylococcus aureus*  
275 alpha toxin, have not previously been reported to trigger lysosomal exocytosis.  
276 Nucleated cells exposed to small pore formers are thought to first internalize these toxins  
277 and then expel them in a membrane-bound exosome-like form [40]. However, the  
278 exocytosis machinery has not been clearly identified. Along these lines, we wished to  
279 determine if the lysosomal exocytosis pathway might be involved in how nucleated cells,  
280 e.g., human T cells, process small pore-forming toxins such as ETX. Intriguingly, similar  
281 to *Staphylococcus aureus* alpha toxin, ETX has been reported to undergo internalization  
282 soon after binding the plasma membrane of nucleated cells [41].

283

284 Administration of ETX (20nM) to human T cells caused significant surface expression of  
285 lysosome associated membrane protein-1 (LAMP1), a marker for the limiting membrane  
286 of the lysosome, and thus a marker for lysosomal exocytosis [39]. To determine if  
287 normal lysosomal function is required for ETX-mediated lysosomal exocytosis, we  
288 disrupted lysosomal acidification and subsequent function, by exposing ETX-treated T  
289 cells to chloroquine, a lysosomotropic agent that strongly suppressed ETX-mediated  
290 lysosomal exocytosis (Fig 5d). Chloroquine preferentially accumulates in acidic  
291 compartments of the cell and prevents acidification because of its protonated basic amine  
292 groups [42, 43].

293

294 Remarkably, lysosomal exocytosis has previously been proposed as a hemolytic  
295 mechanism in the case of anti-Rh sensitized RBCs and engaging monocytes [44]. In this

296 previous study, the drugs colchicine (a microtubule depolymerizing agent), and  
297 hydrocortisone hemisuccinate (a corticosteroid), suppressed monocyte-mediated  
298 hemolysis. The authors suggested that the anti-hemolytic effect of these drugs was the  
299 result of suppressing monocyte lysosomal exocytosis [45]. Similarly, we wished to  
300 determine if blockade of lysosomal exocytosis by chloroquine or other inhibitory  
301 compounds, colchicine and hydrocortisone hemisuccinate, was sufficient to inhibit ETX-  
302 mediated hemolysis. Indeed, we found that each of these compounds inhibited ETX-  
303 mediated hemolysis, chloroquine > hydrocortisone > colchicine (Fig 5e).

304

## 305 **DISCUSSION**

306 We have confirmed the findings of Gao et al. that human blood exposure to *C.*  
307 *perfringens* epsilon toxin results in hemolysis. However, our data extend these findings  
308 and suggest that metal-catalyzed oxidation of the nucleotide-sensitive, volume-regulating  
309 ICln channel is likely responsible for amplifying the hemolytic process, rather than P2  
310 receptor activation. Moreover, we find that ICln may be involved in hemolytic  
311 amplification for pore-forming toxins beyond ETX, e.g., *S. aureus* alpha toxin and  
312 perhaps others. An important experimental distinction between this study and that of Gao  
313 et al. is the substantial difference in the concentration of ETX used. Our hemolytic  
314 assays were conducted at 15nM ETX, while Gao et al. used  $\geq 100$ nM ETX [20].

315

316 We have also shown that human RBCs express a minor MAL isoform (likely MAL  
317 isoform C), which would explain why human RBCs are uniquely susceptible to ETX-  
318 mediated damage, as compared to RBCs from other species that do not express MAL.

319 Similarly, ETX also damages MAL-expressing human T cells, causing them to undergo  
320 lysosomal exocytosis. Our data also show that lysosomal exocytosis contributes to ETX-  
321 mediated hemolysis, as evidenced by hemolytic blockade by lysosomal inhibitors such as  
322 chloroquine. Considering chloroquine's ability to increase pH in a general fashion, we  
323 suspect that it may have a dual effect on inhibiting ETX-mediated hemolysis, as ICln's  
324 ion conductance is pH sensitive [27]. Along these lines, we have observed that  
325 conducting hemolysis assays in bicarbonate buffer also results in slowed ETX-mediated  
326 hemolysis (data not shown). Therefore, the inhibitory action of hydrocortisone and  
327 colchicine might more accurately reflect the true contribution of T cell lysosomal  
328 exocytosis.

329

330 To better understand how lysosomal exocytosis might influence ETX-mediated  
331 hemolysis, we reviewed the literature and identified that lysosomes serve as storage  
332 compartments for redox-active heavy metals such as  $\text{Cu}^+$  and  $\text{Fe}^{3+}$ [46]. For example, the  
333 copper transporter ATP7B actively transports  $\text{Cu}^+$  into the late endosome, which later  
334 fuses with the lysosome [47]. Furthermore, an excess of extracellular copper stimulates  
335 lysosomal copper uptake, and the cell can go on to release accumulated copper into the  
336 extracellular space via expulsion through the lysosomal exocytosis pathway [48]. For  
337 these reasons, we favor the idea that ETX triggers the release of previously stored redox-  
338 active heavy metals from the lysosomal compartment of MAL-expressing T cells, which  
339 are predominantly of the CD4+ lineage [35]. To help visualize this process, we have  
340 composed a diagram to illustrate the proposed mechanism in a step-wise fashion (Fig 6),

341 while figure 7 aims to illustrate a more comprehensive schema for ETX-mediated  
342 hemolysis.  
343  
344 The notion that ICln must first insert into the RBC membrane for metal-catalyzed  
345 oxidation to ensue might lead to the prediction that supernatant harvested from ETX-  
346 exposed T cells would not be sufficient to trigger ETX-mediated hemolysis, and indeed,  
347 we find this to be the case (Supp Fig 4). However, an important caveat to this  
348 experiment is that  $\text{Cu}^+$  ions are unstable in aqueous solution due to rapid oxidation  
349 (oxygen-dependent) and rapid disproportionation (oxygen-independent), and thus must  
350 be chelated in the cytosol by chaperones such as glutathione that are largely absent in the  
351 extracellular space [49]. This lack of extracellular stability could lead to a proximity  
352 requirement for toxin-exposed T cells to have a hemolytic effect on neighboring RBCs.  
353 To address this caveat, we transplanted isolated human leukocytes into blood harvested  
354 from non-human species, i.e., cow and rhesus macaque; RBCs that have been shown to  
355 either lack MAL (cow) or that fail to bind ETX (macaque). ETX-sensitive human  
356 leukocytes were unable to trigger hemolysis in non-human RBCs, even when exposed to  
357 150nM ETX (Supp Fig 5).  
358  
359 In its entirety, this study may help to shed light on how RBCs incur damage during an  
360 acute MS relapse because ETX, a blood-borne neurotoxin, has previously been indicated  
361 as a potential MS trigger due to its remarkable specificity for BBB vasculature and for  
362 CNS myelin [9,10]; the two tissues damaged during each MS attack. The finding that  
363 ETX also causes RBC abnormalities, reminiscent of what has been observed during



364 active MS, may further support the ETX-MS hypothesis. Of note, even though we  
365 assessed ETX-mediated hemolysis in > 70 study participants, we did not observe any  
366 ETX-resistant phenotypes, suggesting that all blood types tested were ETX-susceptible  
367 and express MAL. To our knowledge, MAL expression by circulatory cells has not been  
368 reported in any non-human species to date, thus blood cell sensitivity to ETX may be an  
369 exclusively human trait.

370

371 Should ETX be conclusively shown to trigger nascent MS lesion formation, ICIn  
372 insertion into the RBC plasma membrane and surface LAMP1 expression on CD4+ T  
373 cells may lay the groundwork for novel biomarker development. To date, there are no  
374 biomarkers that can predict MS disease activity. The identification of such biomarkers  
375 may be useful in predicting the onset of neurological symptoms and/or identifying occult  
376 disease activity, as is the case for “silent lesions,” which are detectable on MRI but yield  
377 no observable symptoms [50].

378

379 In addition to surface LAMP1 expression, lysosomal exocytosis also causes the release of  
380 lysosomal hydrolases into the extracellular milieu, and the enzymatic activity of acid  
381 hydrolases such as  $\beta$ -hexosaminidase are commonly used as markers for this cellular  
382 process [48]. These enzymes may also be candidate biomarkers for ETX blood exposure  
383 and early disease activity in multiple sclerosis.

384

385 Finally, identifying the mechanism by which ETX causes RBC lysis may allow for novel  
386 clinical interventions. For example, metal chelation therapy might inhibit hemolysis, thus

387 preventing vascular iron deposition and neuronal toxicity/axonal loss. Although  
388 hemolysis and free hemoglobin have recently been shown to correlate with the transition  
389 from RRMS to SPMS [8], the root cause of this hemolysis has not yet been identified. *C.*  
390 *perfringens* epsilon toxin may adequately explain this phenomenon, in addition to how  
391 nascent MS lesions form in the absence of an inflammatory infiltrate [9, 51].

392

## 393 **MATERIALS AND METHODS**

### 394 **Ethics Statement**

395 Research protocol RRU-0952 for the collection of samples from individuals with MS and  
396 healthy controls was reviewed and approved by the Rockefeller University institutional  
397 review board. All participants in the study gave written informed consent.

398

### 399 **Epsilon Toxin**

400 His-tagged protoxin was procured from BEI Resources, activated by adding an equal  
401 volume of 0.25% trypsin (ThermoFisher) and incubating for 1 hour at 37°C. Trypsin was  
402 then inactivated by the addition of 1:1 volume Defined Trypsin Inhibitor (ThermoFisher).

403

### 404 **Blood Sample Collection and Manipulation**

405 Human blood from healthy adult donors was obtained at the Rockefeller University  
406 hospital using heparinized tubes. Cow, goat, sheep, rat, guinea pig and rhesus macaque

407 blood and enriched human, cow and rat RBCs were all purchased from Innovative  
408 Research, Inc. All whole blood and enriched RBC samples were centrifuged for 5 mins  
409 at 600g, the supernatant was aspirated, and the cell pellet was washed with PBS (20x the  
410 original volume) prior to re-suspension in PBS so as to match the original starting blood  
411 volume. For experiments using transition metals nickel and manganese, human blood was  
412 washed as previously described. However, normal saline was used instead of PBS to  
413 avoid the formation of insoluble  $\text{Ni}_3(\text{PO}_4)_2$  and  $\text{Mn}_3(\text{PO}_4)_2$  salts.

414 For the transfer of human leukocytes to the blood of non-human mammals, human blood  
415 was centrifuged at 600 x g for 5 mins and the plasma layer removed. Pelleted cells were  
416 suspended in 50 volumes of phosphate buffered saline (PBS), centrifuged at 1000 x g,  
417 and suspended in RBC lysis buffer (155 mM  $\text{NH}_4\text{Cl}$ , 12 mM  $\text{NaHCO}_3$ , 0.1 mM EDTA ).  
418 RBCs were allowed to lyse for 5 mins, after which, leukocytes were centrifuged at 600 x  
419 g for 5 mins. Pelleted leukocytes were washed 3 times in PBS and transferred to washed  
420 whole cow or whole macaque blood of a similar original volume.

421

## 422 **Hemolysis Quantitation**

423 After ETX incubation, cells were pelleted at 600g for 5mins, supernatant was harvested  
424 and the degree of hemolysis was determined by light absorbance (OD 540nm) using a  
425 SpectraMax M5 Multi-Mode Microplate Reader (Molecular Devices).

426

427 **Lymphocyte Isolation**

428 Harvested human blood was incubated with RosetteSep Human T cell enrichment  
429 cocktail (STEMCELL Technologies) or RosetteSep Human B cell enrichment cocktail  
430 (STEMCELL Technologies) and then isolated with Ficoll-Paque Plus (GE Healthcare),  
431 as per the manufacturer's instructions.

432

433 **Flow Cytometry Staining and Analysis**

434 For protoETX binding, isolated cells were washed 3 times with PBS 1% BSA buffer, and  
435 incubated for 2 hours at 4°C with 5% donkey serum (PBS 1% BSA ) containing either  
436 50nM or 0nM protoETX. Cells were washed 3 times with chilled PBS 1% BSA buffer,  
437 and then stained for 1 hour at 4°C with primary antibodies: rabbit anti-ETX (JL001.2,  
438 1:1000), mouse anti-CD3 Alexa 660 (eBioscience) 1:200 or mouse anti-CD20 APC  
439 (eBioscience) 1:200. After 3 washes with chilled PBS 1% BSA, cells were then  
440 incubated with Alexa 488-conjugated donkey anti-rabbit (1:1000, Jackson  
441 ImmunoResearch) so as to detect bound JL001.2 antibody, and then thoroughly washed  
442 prior to Flow Cytometry analysis. For cytotoxicity assays, isolated lymphocytes were  
443 stained with mouse anti-CD3 Alexa 660 (1:200) or mouse anti-CD20 APC (1:200), and  
444 propidium iodide (ThermoFisher) 1:500. For lysosomal exocytosis assays, isolated T  
445 cells were stained with mouse anti-LAMP1 Alexa 488 (ThermoFisher) 1:200. All cells  
446 were analyzed by Flow Cytometry with BD AccuriC6 at our core facility.

447

448 **Western blot Analysis of RBC membrane proteins**

449 100 $\mu$ L of purified RBCs were lysed in 900 $\mu$ L ammonium chloride RBC lysis buffer for  
450 10 mins at 37°C. The cell lysate was centrifuged at > 16,000g for 5 mins, and the pellet  
451 was washed 3 times in PBS and re-suspended in 50 $\mu$ L PBS. An equal volume of 2X  
452 Laemmli sample buffer (Bio-Rad) was added to each sample and the dissolved  
453 membranes were stored at -20°C. Thawed samples were diluted 2.5 fold in 1X Laemmli  
454 sample buffer prior to SDS PAGE. Proteins were transferred to an Immobilon-P  
455 membrane (MilliporeSigma) and probed with either mouse-anti MAL 1:1000 (clone E-1,  
456 Santa Cruz Biotechnology, Inc.) or rabbit anti-ICln 1:1000 (PA5-13450, ThermoFisher).  
457 HRP-conjugated donkey anti-mouse IgG and donkey anti-rabbit IgG secondaries  
458 (Jackson ImmunoResearch) were used with the corresponding primary antibody to  
459 visualize MAL expression and ICln expression respectively (1:100,000). SuperSignal  
460 West Femto Maximum Sensitivity Substrate (ThermoFisher) was used to visualize bound  
461 antibody.

462

463 **Anaerobiosis**

464 Anaerobic experiments were performed in an anaerobic hood (BACTRON Anaerobic  
465 Chamber).

466

467 **Drugs and Compounds**

468 All drugs and compounds used in this study were purchased from Sigma Aldrich.

469

470 **Statistical Analysis**

471 Results are representative of data obtained from repeated independent experiments. Each  
472 value represents the mean  $\pm$  *SD* for three replicates. Statistical analysis was performed  
473 using the two-tailed Student *t*-test (GraphPad Software, San Diego, CA, USA).

474 **ACKNOWLEDGEMENTS**

475 We would like to thank Dr. Timothy Vartanian and Dr. Jennifer Linden for providing the  
476 anti-ETX detection antibody, JL001.2, and the anti-ETX neutralizing antibody, JL008.

477

478

479

**REFERENCES**

480

481 1. Waksman BH. 1981. Current trends in multiple sclerosis research. *Immunol*  
482 *Today* 2(5):87-93. doi: 10.1016/0167-5699(81)90038-4.

483

484 2. Plum CM, Fog T. 1959. Studies in multiple sclerosis. I. Changes in the peripheral  
485 blood picture and in the bone marrow. *Acta Psychiatr Neurol Scand* 34 (Suppl  
486 128):13-18.

487

488 3. Laszlo S. Osmotic fragility of the erythrocytes in multiple sclerosis. 1964. *Acta*  
489 *Neurol Psychiatr Belg.* 64:529-33.

490

- 491 4. Caspary EA, Sewell F, Field EJ. 1967. Red blood cell fragility in multiple  
492 sclerosis. *Br Med J* 2(5552):610-1.  
493
- 494 5. Prineas J. 1968. Red blood cell size in multiple sclerosis. *Acta Neurol Scand*  
495 44(1):81-90.  
496
- 497 6. Crellin RF, Bottiglieri T, Reynolds EH. 1989. Multiple sclerosis and  
498 macrocytosis. *Lancet* 2(8672):1157.  
499
- 500 7. Crellin RF, Bottiglieri T, Reynolds EH. 1990. Multiple sclerosis and  
501 macrocytosis. *Acta Neurol Scand* 81(5):388-91.  
502
- 503 8. Lewin A, Hamilton S, Witkover A, Langford P, Nicholas R, Chataway J, et al.  
504 2016. Free serum haemoglobin is associated with brain atrophy in secondary  
505 progressive multiple sclerosis. *Wellcome Open Res* 1:10.  
506 doi:10.12688/wellcomeopenres.9967.2.  
507
- 508 9. Rumah KR, Linden J, Fischetti VA, Vartanian T. 2013. Isolation of *Clostridium*  
509 *perfringens* type B in an individual at first clinical presentation of multiple  
510 sclerosis provides clues for environmental triggers of the disease. *PLoS One*  
511 8(10):e76359. doi: 10.1371/journal.pone.0076359. eCollection 2013.  
512

- 513 10. Rumah KR, Ma Y, Linden JR, Oo ML, Anrather J, Schaeren-Wiemers N, et al.  
514 2015. The Myelin and Lymphocyte Protein MAL Is Required for Binding and  
515 Activity of *Clostridium perfringens*  $\epsilon$ -Toxin. *PLoS Pathog* 11(5):e1004896. doi:  
516 10.1371/journal.ppat.1004896. eCollection 2015 May.
- 517
- 518 11. Linden JR, Ma Y, Zhao B, Harris JM, Rumah KR, Schaeren-Wiemers N, et al.  
519 2015. *Clostridium perfringens* Epsilon Toxin Causes Selective Death of Mature  
520 Oligodendrocytes and Central Nervous System Demyelination. *MBio*.  
521 6(3):e02513. doi: 10.1128/mBio.02513-14.
- 522
- 523 12. Rumah KR, Vartanian TK, Fischetti VA. 2017. Oral Multiple Sclerosis Drugs  
524 Inhibit the *In vitro* Growth of Epsilon Toxin Producing Gut Bacterium,  
525 *Clostridium perfringens*. *Front Cell Infect Microbiol* 7:11. doi:  
526 10.3389/fcimb.2017.00011. eCollection 2017.
- 527
- 528 13. Wagley S, Bokori-Brown M, Morcrette H, Malaspina A, D'Arcy C, Gnanapavan  
529 S, et al. 2018. Evidence of *Clostridium perfringens* epsilon toxin associated with  
530 multiple sclerosis. *Mult Scler* 1352458518767327. doi:  
531 10.1177/1352458518767327.
- 532
- 533 14. Rood JI, Adams V, Lacey J, Lyras D, McClane BA, Melville SB, et al. 2018.  
534 Expansion of the *Clostridium perfringens* toxin-based typing scheme. *Anaerobe*  
535 53:5-10. doi: 10.1016/j.anaerobe.2018.04.011. Epub 2018 Apr 20.



536

537 15. Carman RJ, Sayeed S, Li J, Genheimer CW, Hiltonsmith MF, Wilkins TD, et al.  
538 2008. Clostridium perfringens toxin genotypes in the feces of healthy North  
539 Americans. Anaerobe. 14(2):102-8. doi: 10.1016/j.anaerobe.2008.01.003. Epub  
540 2008 Feb 7.

541

542 16. Popoff MR. 2011. Epsilon toxin: a fascinating pore-forming toxin. FEBS J  
543 278(23):4602-15. doi: 10.1111/j.1742-4658.2011.08145.x. Epub 2011 May 25.  
544 Review.

545

546 17. Freedman JC, Li J, Uzal FA, McClane BA. 2014. Proteolytic processing and  
547 activation of Clostridium perfringens epsilon toxin by caprine small intestinal  
548 contents. MBio 5(5):e01994-14. doi: 10.1128/mBio.01994-14.

549

550 18. Dorca-Arévalo J, Soler-Jover A, Gibert M, Popoff MR, Martín-Satué M, Blasi J.  
551 2008. Binding of epsilon-toxin from Clostridium perfringens in the nervous  
552 system. Vet Microbiol 131(1-2):14-25. doi: 10.1016/j.vetmic.2008.02.015. Epub  
553 2008 Mar 4.

554

555 19. Wioland L, Dupont JL, Doussau F, Gaillard S, Heid F, Isope P, et al. 2015.  
556 Epsilon toxin from Clostridium perfringens acts on oligodendrocytes without  
557 forming pores, and causes demyelination. Cell Microbiol 17(3):369-88. doi:  
558 10.1111/cmi.12373. Epub 2014 Oct 31.

559

560 20. Gao J, Xin W, Huang J, Ji B, Gao S, Chen L, et al. 2018. Research  
561 article Hemolysis in human erythrocytes by *Clostridium perfringens* epsilon toxin  
562 requires activation of P2 receptors. *Virulence* 9(1):1601-1614. doi:  
563 10.1080/21505594.2018.1528842.

564

565 21. Bryk AH, Wiśniewski JR. 2017. Quantitative Analysis of Human Red Blood Cell  
566 Proteome. *J Proteome Res* 16(8):2752-2761. doi: 10.1021/acs.jproteome.7b00025.  
567 Epub 2017 Jul 24.

568

569 22. Coddou C, Yan Z, Obsil T, Huidobro-Toro JP, Stojilkovic SS. 2011. Activation  
570 and regulation of purinergic P2X receptor channels. *Pharmacol Rev* 63(3):641-83.  
571 doi: 10.1124/pr.110.003129. Epub 2011 Jul 7. Review.

572

573 23. Guedes S, Vitorino R, Domingues R, Amado F, Domingues P. 2009. Oxidation of  
574 bovine serum albumin: identification of oxidation products and structural  
575 modifications. *Rapid Commun Mass Spectrom* 23(15):2307-15. doi:  
576 10.1002/rcm.4149.

577

578 24. Rubino JT, Chenkin MP, Keller M, Riggs-Gelasco P, Franz KJ. 2011. A  
579 comparison of methionine, histidine and cysteine in copper(I)-binding peptides  
580 reveals differences relevant to copper uptake by organisms in diverse  
581 environments. *Metallomics* 3(1):61-73.

582

583 25. Schwartz RS, Rybicki AC, Nagel RL. 1997. Molecular cloning and expression of  
584 a chloride channel-associated protein pICln in human young red blood cells:  
585 association with actin. *Biochem J* 327 ( Pt 2):609-16.

586

587 26. Fürst J, Jakab M, König M, Ritter M, Gschwentner M, Rudzki J, et al. 2000.  
588 Structure and function of the ion channel ICln. *Cell Physiol Biochem* 10(5-  
589 6):329-34. Review.

590

591 27. Fürst J, Bazzini C, Jakab M, Meyer G, König M, Gschwentner M, et al. 2000.  
592 Functional reconstitution of ICln in lipid bilayers. *Pflugers Arch* 440(1):100-15.

593

594 28. Paulmichl M, Li Y, Wickman K, Ackerman M, Peralta E, Clapham D. 1992. New  
595 mammalian chloride channel identified by expression cloning. *Nature*  
596 356(6366):238-41.

597

598 29. Gschwentner M, Susanna A, Schmarda A, Laich A, Nagl UO, Ellemunter H,  
599 Deetjen P, Frick J, Paulmichl M. 1996. ICln: a chloride channel paramount for  
600 cell volume regulation. *J Allergy Clin Immunol* 98(5 Pt 2):S98-101; discussion  
601 S105-6. Review.

602

- 603 30. Buyse G, Voets T, Tytgat J, De Greef C, Droogmans G, Nilius B, Eggermont J.  
604 1997. Expression of human pICln and ClC-6 in *Xenopus* oocytes induces an  
605 identical endogenous chloride conductance. *J Biol Chem* 272(6):3615-21.  
606
- 607 31. Gschwentner M, Susanna A, Wöll E, Ritter M, Nagl UO, Schmarda A, et al.  
608 1995. Antiviral drugs from the nucleoside analog family block volume-activated  
609 chloride channels. *Mol Med* 1(4):407-17.  
610
- 611 32. Skals M, Leipziger J, Praetorius HA. 2011. Haemolysis induced by  $\alpha$ -toxin from  
612 *Staphylococcus aureus* requires P2X receptor activation. *Pflugers Arch*  
613 462(5):669-79. doi: 10.1007/s00424-011-1010-x. Epub 2011 Aug 17.  
614
- 615 33. Rancaño C, Rubio T, Correas I, Alonso MA. 1994. Genomic structure and  
616 subcellular localization of MAL, a human T-cell-specific proteolipid protein. *J*  
617 *Biol Chem* 269(11):8159-64.  
618
- 619 34. Millán J, Puertollano R, Fan L, Rancaño C, Alonso MA. 1997. The MAL  
620 proteolipid is a component of the detergent-insoluble membrane subdomains of  
621 human T-lymphocytes. *Biochem J* 321 ( Pt 1):247-52.  
622
- 623 35. Copie-Bergman C, Plonquet A, Alonso MA, Boulland ML, Marquet J, Divine M,  
624 Möller P, Leroy K, Gaulard P. 2002. MAL expression in lymphoid cells: further  
625 evidence for MAL as a distinct molecular marker of primary mediastinal large B-

- 626 cell lymphomas. *Mod Pathol* 15(11):1172-80.
- 627
- 628 36. Blanch M, Dorca-Arévalo J, Not A, Cases M, Gómez de Aranda I, Martínez-  
629 Yélamos A, Martínez-Yélamos S, Solsona C, Blasi J. 2018. The Cytotoxicity of  
630 Epsilon Toxin from *Clostridium perfringens* on Lymphocytes Is Mediated by  
631 MAL Protein Expression. *Mol Cell Biol* 38(19). pii: e00086-18. doi:  
632 10.1128/MCB.00086-18. Print 2018 Oct 1.
- 633
- 634 37. Idone V, Tam C, Goss JW, Toomre D, Pypaert M, Andrews NW. 2008. Repair of  
635 injured plasma membrane by rapid Ca<sup>2+</sup>-dependent endocytosis. *J Cell Biol*  
636 180(5):905-14. doi: 10.1083/jcb.200708010. Epub 2008 Mar 3.
- 637
- 638 38. Tam C, Flannery AR, Andrews N. 2013. Live imaging assay for assessing the  
639 roles of Ca<sup>2+</sup> and sphingomyelinase in the repair of pore-forming toxin wounds. *J*  
640 *Vis Exp* (78):e50531. doi: 10.3791/50531.
- 641
- 642 39. von Hoven G, Rivas AJ, Neukirch C, Meyenburg M, Qin Q, Parekh S, et al. 2017.  
643 Repair of a Bacterial Small  $\beta$ -Barrel Toxin Pore Depends on Channel Width.  
644 *MBio* 8(1). pii: e02083-16. doi: 10.1128/mBio.02083-16.
- 645
- 646 40. Husmann M, Beckmann E, Boller K, Kloft N, Tenzer S, Bobkiewicz W, et al.  
647 2009. Elimination of a bacterial pore-forming toxin by sequential endocytosis and

648 exocytosis. FEBS Lett 583(2):337-44. doi: 10.1016/j.febslet.2008.12.028. Epub  
649 2008 Dec 25.

650

651 41. Nagahama M, Itohayashi Y, Hara H, Higashihara M, Fukatani Y, Takagishi T,  
652 Oda M, Kobayashi K, Nakagawa I, Sakurai J. 2011. Cellular vacuolation induced  
653 by *Clostridium perfringens* epsilon-toxin. FEBS J 278(18):3395-407. doi:  
654 10.1111/j.1742-4658.2011.08263.x. Epub 2011 Aug 16.

655

656 42. Schultz KR, Gilman AL. 1997. The lysosomotropic amines, chloroquine and  
657 hydroxychloroquine: a potentially novel therapy for graft-versus-host disease.  
658 Leuk Lymphoma 24(3-4):201-10. Review.

659

660 43. Pasquier B. 2016. Autophagy inhibitors. Cell Mol Life Sci 73(5):985-1001. doi:  
661 10.1007/s00018-015-2104-y. Epub 2015 Dec 11. Review.

662

663 44. Fler A, Koopman MG, von dem Borne AE, Engelfriet CP. 1978. Monocyte-  
664 induced increase in osmotic fragility of human red cells sensitized with anti-D  
665 alloantibodies. Br J Haematol 40(3):439-46.

666

667 45. Fler A, van Schaik ML, von dem Borne AE, Engelfriet CP. 1978. Destruction of  
668 sensitized erythrocytes by human monocytes in vitro: effects of cytochalasin B,  
669 hydrocortisone and colchicine. Scand J Immunol 8(6):515-24.

670

- 671 46. Blaby-Haas CE, Merchant SS. 2014. Lysosome-related organelles as mediators of  
672 metal homeostasis. *J Biol Chem* 289(41):28129-36. doi:  
673 10.1074/jbc.R114.592618. Epub 2014 Aug 26.  
674
- 675 47. Polishchuk EV, Concilli M, Iacobacci S, Chesi G, Pastore N, Piccolo P, et al.  
676 2014. Wilson disease protein ATP7B utilizes lysosomal exocytosis to maintain  
677 copper homeostasis. *Dev Cell* 29(6):686-700. doi: 10.1016/j.devcel.2014.04.033.  
678 Epub 2014 Jun 5.  
679
- 680 48. Peña K, Coblenz J, Kiselyov K. 2015. Brief exposure to copper activates  
681 lysosomal exocytosis. *Cell Calcium* 57(4):257-62. doi:  
682 10.1016/j.ceca.2015.01.005. Epub 2015 Jan 12.  
683
- 684 49. Johnson DK, Stevenson MJ, Almadidy ZA, Jenkins SE, Wilcox DE, Grosseohme  
685 NE. 2015. Stabilization of Cu(I) for binding and calorimetric measurements in  
686 aqueous solution. *Dalton Trans* 44(37):16494-505. doi: 10.1039/c5dt02689j.  
687
- 688 50. Traboulsee A. 2007. MRI relapses have significant pathologic and clinical  
689 implications in multiple sclerosis. *J Neurol Sci* 256 Suppl 1:S19-22. Epub 2007  
690 Mar 7. Review.  
691
- 692 51. Barnett MH, Prineas JW. 2004. Relapsing and remitting multiple sclerosis:  
693 pathology of the newly forming lesion. *Ann Neurol* 55(4):458-68.

694

## Figure Legends

695

696 **Fig 1. ETX causes human-specific hemolysis via human RBC MAL expression.**

697 **a)** Washed whole human, cow, sheep, goat and guinea pig blood was suspended in PBS  
698 and incubated with 15nM ETX at 37°C, and sampled over 24 hours. Data shown are  
699 from experiments performed in triplicate. Error bars represent standard deviations, and  
700 asterisks indicate that results are statistically significant compared with refractory guinea  
701 pig blood (dark blue); Student's *t*-test, \**P* < 0.0001. **b)** Human, rhesus macaque, rat and  
702 sheep RBCs were incubated with non-toxic protoETX (50nM) for 2 hours at 4°C. Toxin  
703 binding was detected via flow cytometry using custom anti-ETX antibody, JL001.2.  
704 Data shown are from a single experiment and are representative of 3 independent  
705 experiments, using 3 distinct blood donors. **c)** Human, cow and rat RBC membranes were  
706 analyzed for MAL expression by Western blot (left). RBC membranes harvested from  
707 additional human donors were also analyzed (right). The open arrowhead signifies full  
708 length MAL, while the closed arrowhead signifies the shortened MAL isoform.

709

710 **Fig 2. Extracellular nucleotides inhibit ETX-mediated hemolysis.**

711 **a)** Washed whole human blood was pre-incubated with oxidized ATP (oxATP), ATP,  
712 GTP and UMP (10mM each) prior to ETX exposure (15nM) at 37°C, and sampled over  
713 24 hours. Data shown are from experiments performed in triplicate. Error bars represent  
714 standard deviations, and asterisks indicate that results are statistically significant  
715 compared with PBS vehicle control (gray); Student's *t*-test, \**P* < 0.0002. **b)** Washed  
716 whole human blood was exposed to the irreversible P2 receptor inhibitor, oxATP,



717 overnight at 37°C. OxATP was either allowed to remain in the suspension buffer  
718 (oxATP 10mM) or washed out. All samples were then incubated with ETX (15nM) at  
719 37°C, and sampled over 24 hours. Data shown are from experiments performed in  
720 triplicate. Error bars represent standard deviations, and asterisks indicate that results are  
721 statistically significant compared with PBS vehicle control (green); Student's *t*-test, \**P* <  
722 0.0002.

723

724 **Fig 3. Oxygen and redox-active transition metals, Cu<sup>+</sup> and Fe<sup>3+</sup>, are integral to ETX-**  
725 **mediated hemolysis. a)** Washed whole human blood was suspended in PBS and  
726 exposed to 15nM ETX at 37°C under anaerobic conditions, aerobic conditions or co-  
727 incubated with sodium azide (10mM) and sampled over 24 hours. Data shown are from  
728 experiments performed in triplicate. Error bars represent standard deviations, and  
729 asterisks indicate that results are statistically significant compared with aerobic control  
730 (green); Student's *t*-test, \**P* < 0.0001.

731 **b)** Washed whole human blood was exposed to ETX (15nM) at 37°C over 24 hours, and  
732 co-incubated with metal chelators (5mg/mL each), deferoxamine (DFO), THPTA,  
733 penicillamine (Pncl), citrate or PBS buffer control. Data shown are from experiments  
734 performed in triplicate. Error bars represent standard deviations, and asterisks indicate  
735 that results are statistically significant compared with PBS vehicle control (gray);  
736 Student's *t*-test, \**P* < 0.0003. **c)** The inhibitory effects of endogenous metal chelating  
737 amino acids (5mg/mL each), cysteine, histidine and methionine were compared to that of  
738 non-chelating amino acids (5mg/mL each), lysine, glutamate and glycine. All samples  
739 were exposed to ETX (15nM) at 37°C and sampled over 30 mins. Data shown are from

740 experiments performed in triplicate. Error bars represent standard deviations, and  
741 asterisks indicate that results are statistically significant compared with glycine (farthest  
742 right); Student's *t*-test,  $*P < 0.01$ . **d)** Washed whole human blood was suspended in  
743 isotonic saline with or without divalent cations (15mM each), Ni<sup>2+</sup> or Mn<sup>2+</sup> (redox-silent  
744 transition metals) or Ca<sup>2+</sup> (alkaline earth metal), and assessed for inhibition of ETX-  
745 mediated hemolysis (15nM ETX at 37°C) over 24 hours. Data shown are from  
746 experiments performed in triplicate. Error bars represent standard deviations, and  
747 asterisks indicate that results are statistically significant compared with NaCl vehicle  
748 control (green); Student's *t*-test,  $*P \leq 0.0003$ .

749

750 **Fig 4. Inhibitors of the nucleotide-sensitive, heavy metal-binding ICln chloride**  
751 **channel block pore forming toxin-mediated hemolysis. a)** Washed whole human blood  
752 was pre-incubated the chromone class of ICln inhibitors, cromolyn and nedocromil  
753 (5mg/mL) prior to ETX exposure (15nM at 37°C), and sampled over 24 hours. Data  
754 shown are from experiments performed in triplicate. Error bars represent standard  
755 deviations, and asterisks indicate that results are statistically significant compared with  
756 PBS vehicle control (green); Student's *t*-test,  $*P < 0.0004$ . **b)** Washed whole human  
757 blood was pre-incubated with the ICln inhibitor, cyclamate anion (154mM) or acetate as  
758 a control organic anion (154mM) prior to ETX exposure (15nM at 37°C), and sampled  
759 over 24 hours. Data shown are from experiments performed in triplicate. Error bars  
760 represent standard deviations, and asterisks indicate that results are statistically  
761 significant compared with the NaCl control (green); Student's *t*-test,  $*P < 0.0001$ . **c)**  
762 Washed whole human blood was pre-incubated with a full panel of known ICln

763 inhibitors, ATP, oxATP, cromolyn (5mg/mL each); sodium cyclamate (154mM); and  
764 NiCl<sub>2</sub> (15mM) prior to ETX exposure (15nM at 37°C), and sampled over 24 hours. Data  
765 shown are from experiments performed in triplicate. Error bars represent standard  
766 deviations, and asterisks indicate that results are statistically significant compared with  
767 the NaCl control (blue); Student's *t*-test, \**P* < 0.0001. **d)** Human RBC membranes were  
768 analyzed for differential ICln expression in the setting of increasing ETX concentrations  
769 by Western blot analysis. Arrowheads signify individual components of the ICln  
770 monomer (closed) and its doublet (open). Data shown are from a single experiment and  
771 are representative of 3 independent experiments, using 3 distinct blood donors. **e)**  
772 Washed whole human blood was exposed to P2 receptor inhibition (green asterisks \*), a  
773 full panel of ICln inhibitors (red asterisks \*) and redox-active metal chelators (blue  
774 asterisks \*) prior to being exposed to a hemolytic dose of *S. aureus* alpha-toxin (525nMα  
775 at 37°C) and sampled over 24 hours. Data shown are from experiments performed in  
776 triplicate. Error bars represent standard deviations, and black asterisks indicate that  
777 results are statistically significant compared with the NaCl as a control for NiCl<sub>2</sub> and  
778 NaCyclamate, and PBS as a vehicle control for all nucleotides and metal chelators;  
779 Student's *t*-test, \**P* < 0.0007.

780

781 **Fig 5. Leukocytes contribute to hemolysis via ETX-triggered T cell lysosomal**  
782 **exocytosis.**

783 **a)** Leukocyte-depleted human blood was washed and suspended in PBS, incubated with  
784 15nM ETX at 37°C and sampled over 24 hours. Hemolysis was compared to that of  
785 washed whole human blood incubated under the same experimental conditions. Data

786 shown are from experiments performed in triplicate. Error bars represent standard  
787 deviations, and asterisks indicate that results are statistically significant compared with  
788 human blood (blue); Student's *t*-test,  $*P < 0.0001$ . **b)** Isolated B cells, T cells and  
789 human RBCs were incubated with non-toxic protoETX (50nM) for 2 hours at 4°C. Toxin  
790 binding was detected via flow cytometry using custom anti-ETX antibody, JL001.2.  
791 Data shown are from a single experiment and are representative of 3 independent  
792 experiments, using 3 distinct blood donors. **c)** Isolated T and B cells were exposed  
793 activated ETX (50nM) for 1 hour at 37°C and assessed for membrane integrity by  
794 propidium iodide (PI) uptake. Data shown are from a single experiment and are  
795 representative of 3 independent experiments, using 3 distinct blood donors. **d)** Isolated T  
796 cells were exposed to activated ETX (20nM) for 1 hour at 37°C with or without the  
797 lysosomotropic agent, chloroquine (ChlQ). Data shown are from a single experiment and  
798 are representative of 3 independent experiments, using 3 distinct blood donors. **e)**  
799 Washed whole human blood was suspended in PBS and incubated with different  
800 inhibitors of lysosomal exocytosis, chloroquine, hydrocortisone hemisuccinate and  
801 colchicine, 4 hours prior to ETX administration. All samples were then treated with ETX  
802 (15nM), incubated at 37°C, and sampled over 24 hours. Data shown are means and SD  
803 from a single experiment and are representative of 3 independent triplicate experiments.  
804 Asterisks indicate that results are statistically significant compared with PBS vehicle  
805 control (purple); Student's *t*-test,  $*P < 0.005$ .

806

807

808

809 **Fig 6. A schematic illustration of ETX-mediated lysosomal exocytosis**

810 **1)** Epsilon toxin ( $\epsilon$ ) binds to the T cell plasma membrane via its cellular receptor  
811 (possibly Myelin And Lymphocyte protein, MAL). **2)** Seven ETX subunits form a pre-  
812 pore complex at the cell surface. **3)** The heptameric pre-pore matures into a  
813 transmembrane pore (cylinder). **4)** Pore formation triggers membrane invagination and  
814 endosome formation. **5)** As the late endosome matures, ETX-containing intraluminal  
815 vesicles (ILV) begin to form. Concurrently, cytosolic  $\text{Cu}^+$  ions are being transported into  
816 the late endosome via the ATP7B copper transporter. **6)** Upon becoming a mature  
817 lysosome, fusion occurs between the lysosomal membrane and the plasma membrane,  
818 resulting in lysosomal exocytosis. Lysosomal exocytosis releases exosome-like, ETX-  
819 containing microparticles (Exo), similar to what has previously been described for toxins  
820 that form small pores ( $< 2\text{nm}$  in diameter) such as *S. aureus* alpha toxin [40], into the  
821 extracellular space. In addition to releasing ETX-containing microparticles, redox-active  
822 heavy metals stored in the lysosome such as  $\text{Cu}^+$  are also released.

823

824 **Fig 7. A schematic illustration of ETX-mediated RBC lysis**

825 **1)** Epsilon toxin ( $\epsilon$ ) binds to the human RBC membrane via a cellular receptor (possibly  
826 MAL isoform C). **2)** Oligomerized toxin forms a pore and inserts into the RBC  
827 membrane, allowing unregulated influx of ions and water. **3)** Cellular swelling causes  
828 rapid insertion of the ICln chloride channel as a countermeasure to resist osmolysis,  
829 resulting in the efflux of ions and water. **4)** The ETX pore facilitates the release of  
830 intracellular redox-active heavy metals from both the T cell ( $\text{Cu}^+$ ) and RBC cytosol  
831 ( $\text{Fe}^{3+}$ ). **5)** Extracellular heavy metals bind to and damage the ICln pore in an oxygen-

832 dependent fashion. **6)** Metal-catalyzed oxidation of the ICln pore results in a deregulated  
833 channel that allows ions and water to flow down their diffusion gradient resulting in  
834 eventual osmolysis.

835

836 **Supplemental Fig 1. SDS PAGE analysis of His-tagged protoETX**

837 His-tagged prototoxin (BEI Resources) was diluted in PBS and combined with 2X  
838 laemmli sample buffer (1:1 volume), heated at 90°C for 6 minutes and subjected to  
839 electrophoresis on a 4-12% Bis-Tris gel. Proteins were stained using a colloidal blue  
840 protein staining kit.

841

842 **Supplemental Fig 2. ProtoETX requires trypsin activation to gain hemolytic**

843 **activity.**

844 Washed whole human blood was exposed to trypsin activated ETX (15nM) or non-toxic  
845 protoETX (15nM), incubated at 37°C, and sampled over 24 hours. Data shown are means  
846 and SD from a single experiment and are representative of 3 independent triplicate  
847 experiments. Asterisks indicate that results for protoETX (blue) are significant different  
848 when compared to active ETX (red); Student's *t*-test, \**P* < 0.0001.

849

850 **Supplemental Fig 3. Neutralizing anti-ETX monoclonal JL008 inhibits ETX-**

851 **mediated hemolysis in a dose-dependent manner. a)** Washed whole human blood was  
852 pre-incubated with a neutralizing anti-ETX rabbit monoclonal (JL008) at varying  
853 concentrations ( $10^{-2}$ ,  $10^{-3}$  and  $10^{-4}$ ) and compared to a rabbit isotype control antibody (Rb  
854 IgG), and PBS vehicle control. All samples were treated with ETX (15nM), incubated at

855 37°C, and sampled over 24 hours. Data shown are means and SD from a single  
856 experiment and are representative of 3 independent triplicate experiments. Asterisks  
857 indicate that results are statistically significant compared with PBS vehicle control (light  
858 blue); Student's *t*-test, \**P* < 0.0007.

859

860 **Supplemental Fig 4. Supernatant from ETX-exposed human T cells is not sufficient**  
861 **to trigger hemolysis.** Human T cell isolates were treated with ETX (30nM) at 37°C for  
862 1 hour in PBS buffer (1% BSA). Supernatant was harvested and unbound ETX was  
863 neutralized with anti-ETX rabbit monoclonal, JL008 (10<sup>-2</sup>). Alternatively, the supernatant  
864 was incubated with a control rabbit isotype control antibody, Rb IgG (10<sup>-2</sup>). Supernatants  
865 were added to washed whole human blood and incubated at 37°C, and sampled over 24  
866 hours. Data shown are means and SD from a single experiment and are representative of  
867 3 independent triplicate experiments. Asterisks indicate that results are statistically  
868 significant compared with the positive control, 30nM ETX (purple); Student's *t*-test, \**P* <  
869 0.0001.

870

871 **Supplemental Fig 5. Transfer of human leukocytes into non-human, ETX-resistant**  
872 **blood, fails to confer ETX hemolytic sensitivity.** Human leukocytes were isolated and  
873 transferred into washed whole cow or whole rhesus macaque blood, incubated with  
874 150nM ETX at 37°C, and sampled over 24 hours. Data shown are means and SD from a  
875 single experiment and are representative of 3 independent triplicate experiments.  
876 Asterisks indicate that results are statistically significant compared with ETX (150nM)  
877 treated, washed whole human blood (blue); Student's *t*-test, \**P* < 0.0001.

Figure 1a

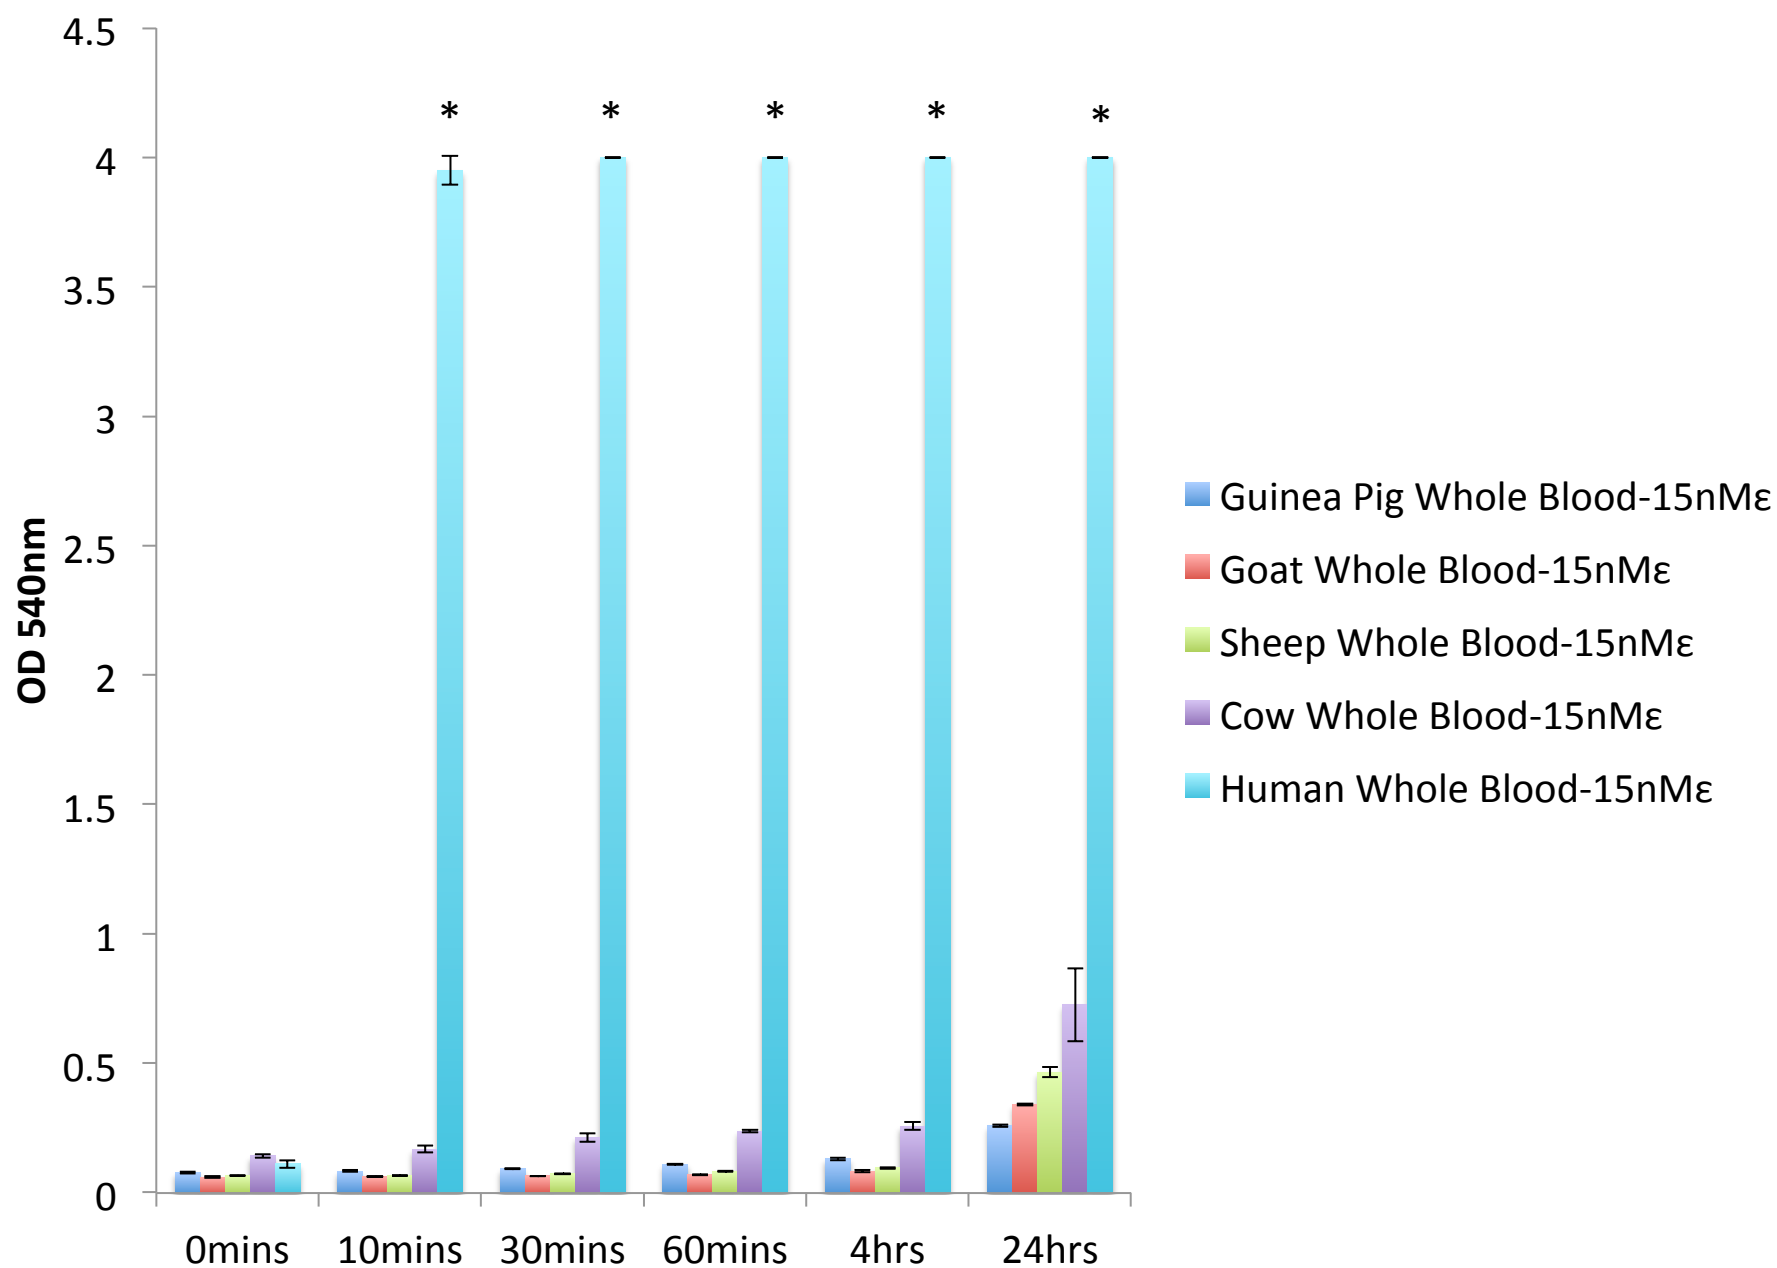



Figure 1b

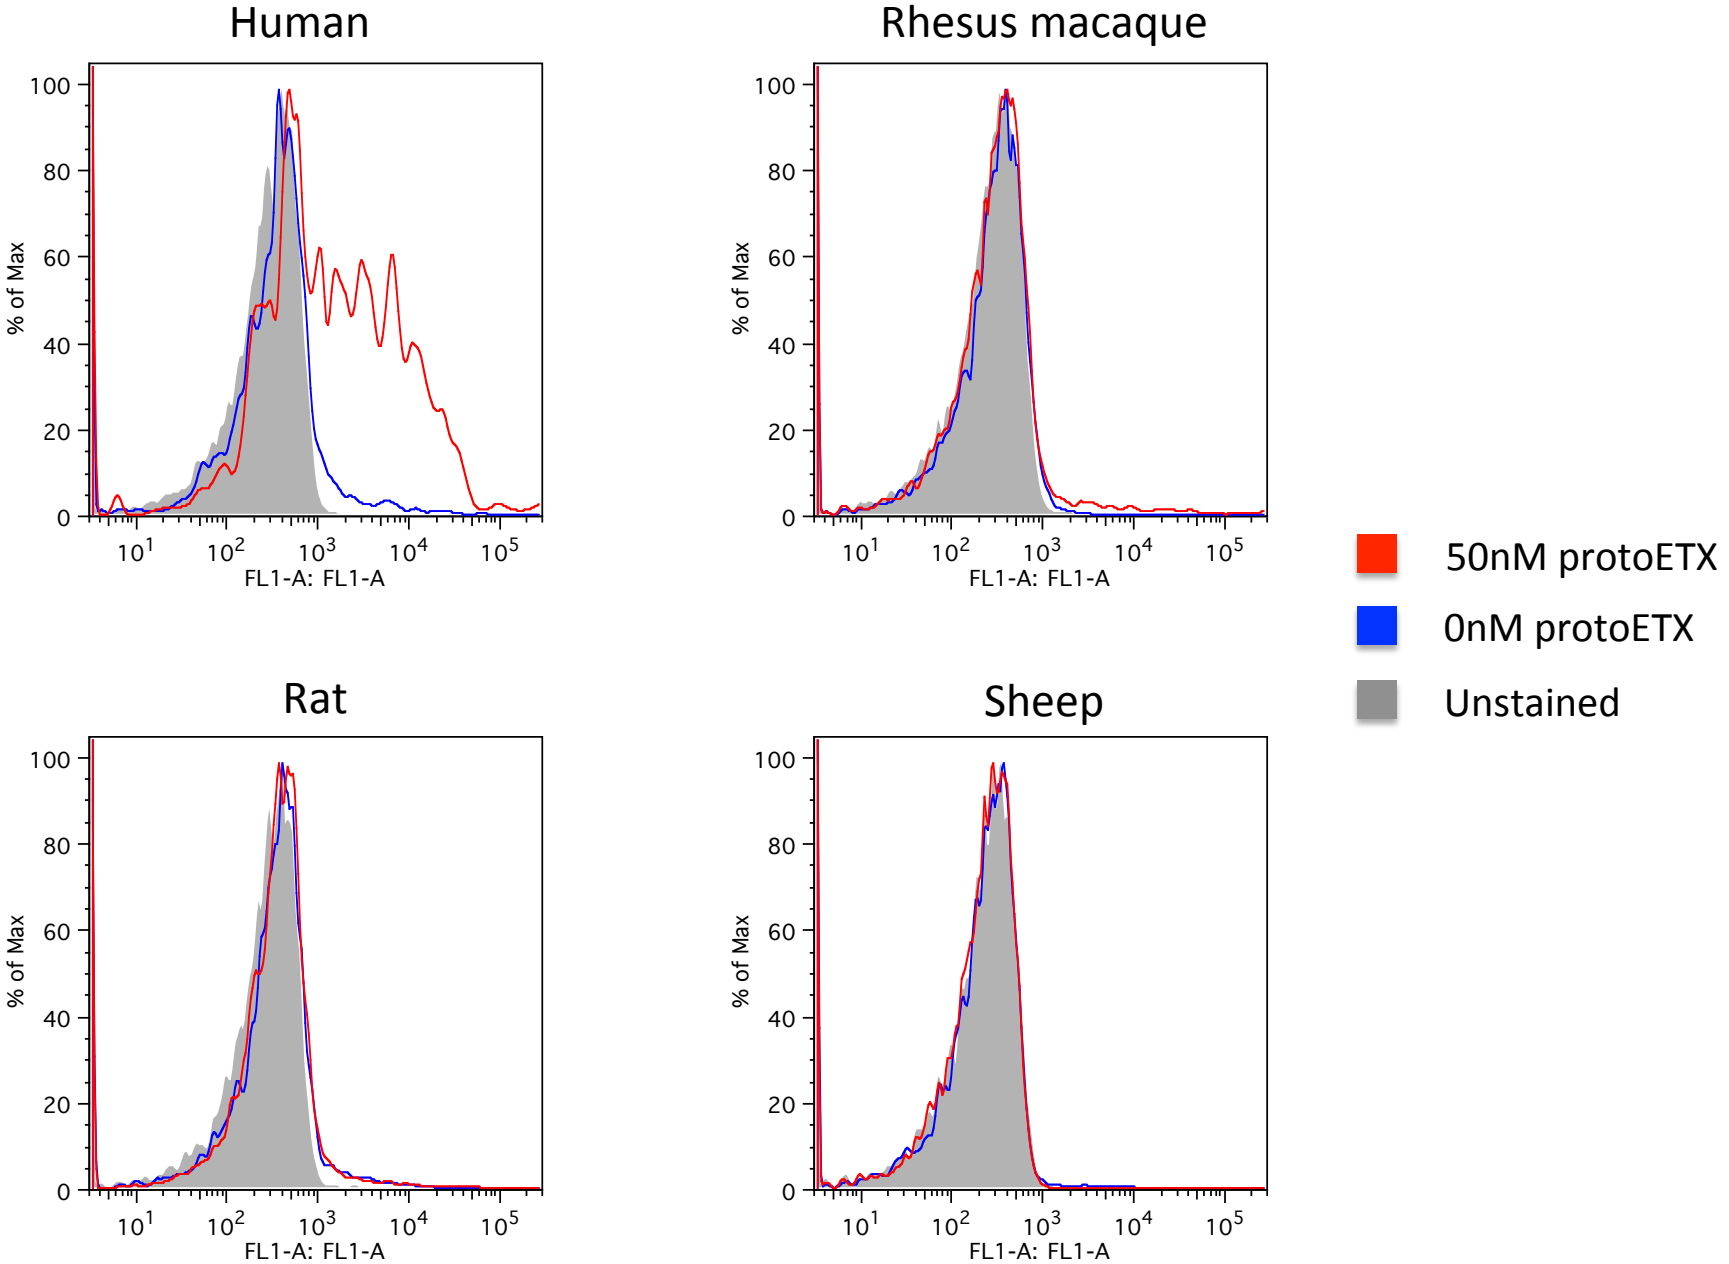

Figure 1c

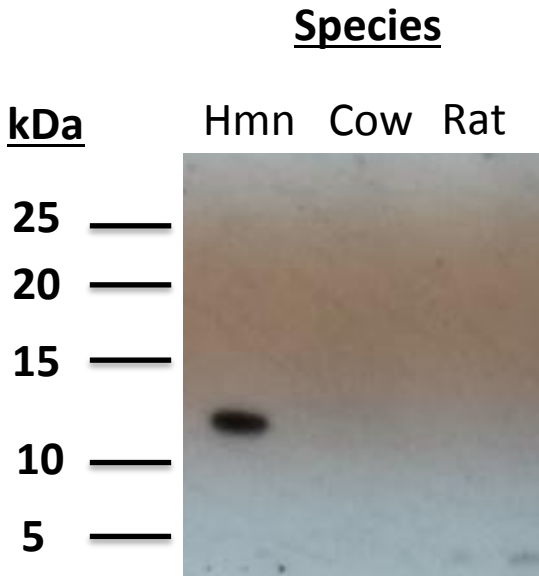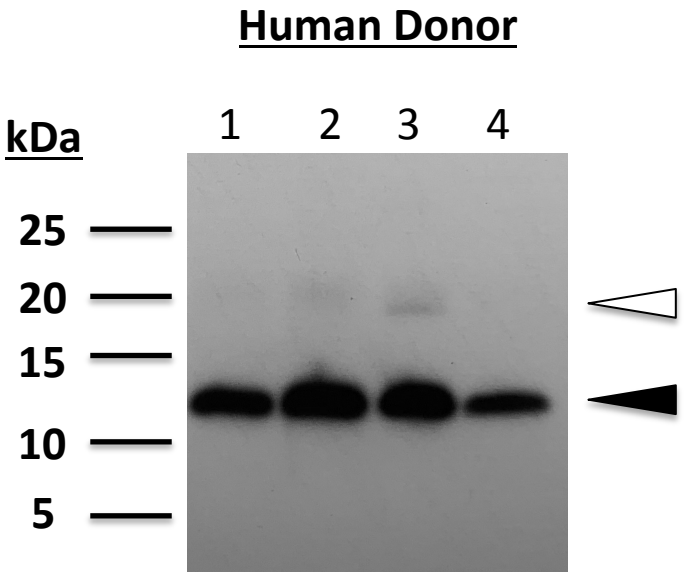

Figure 2a

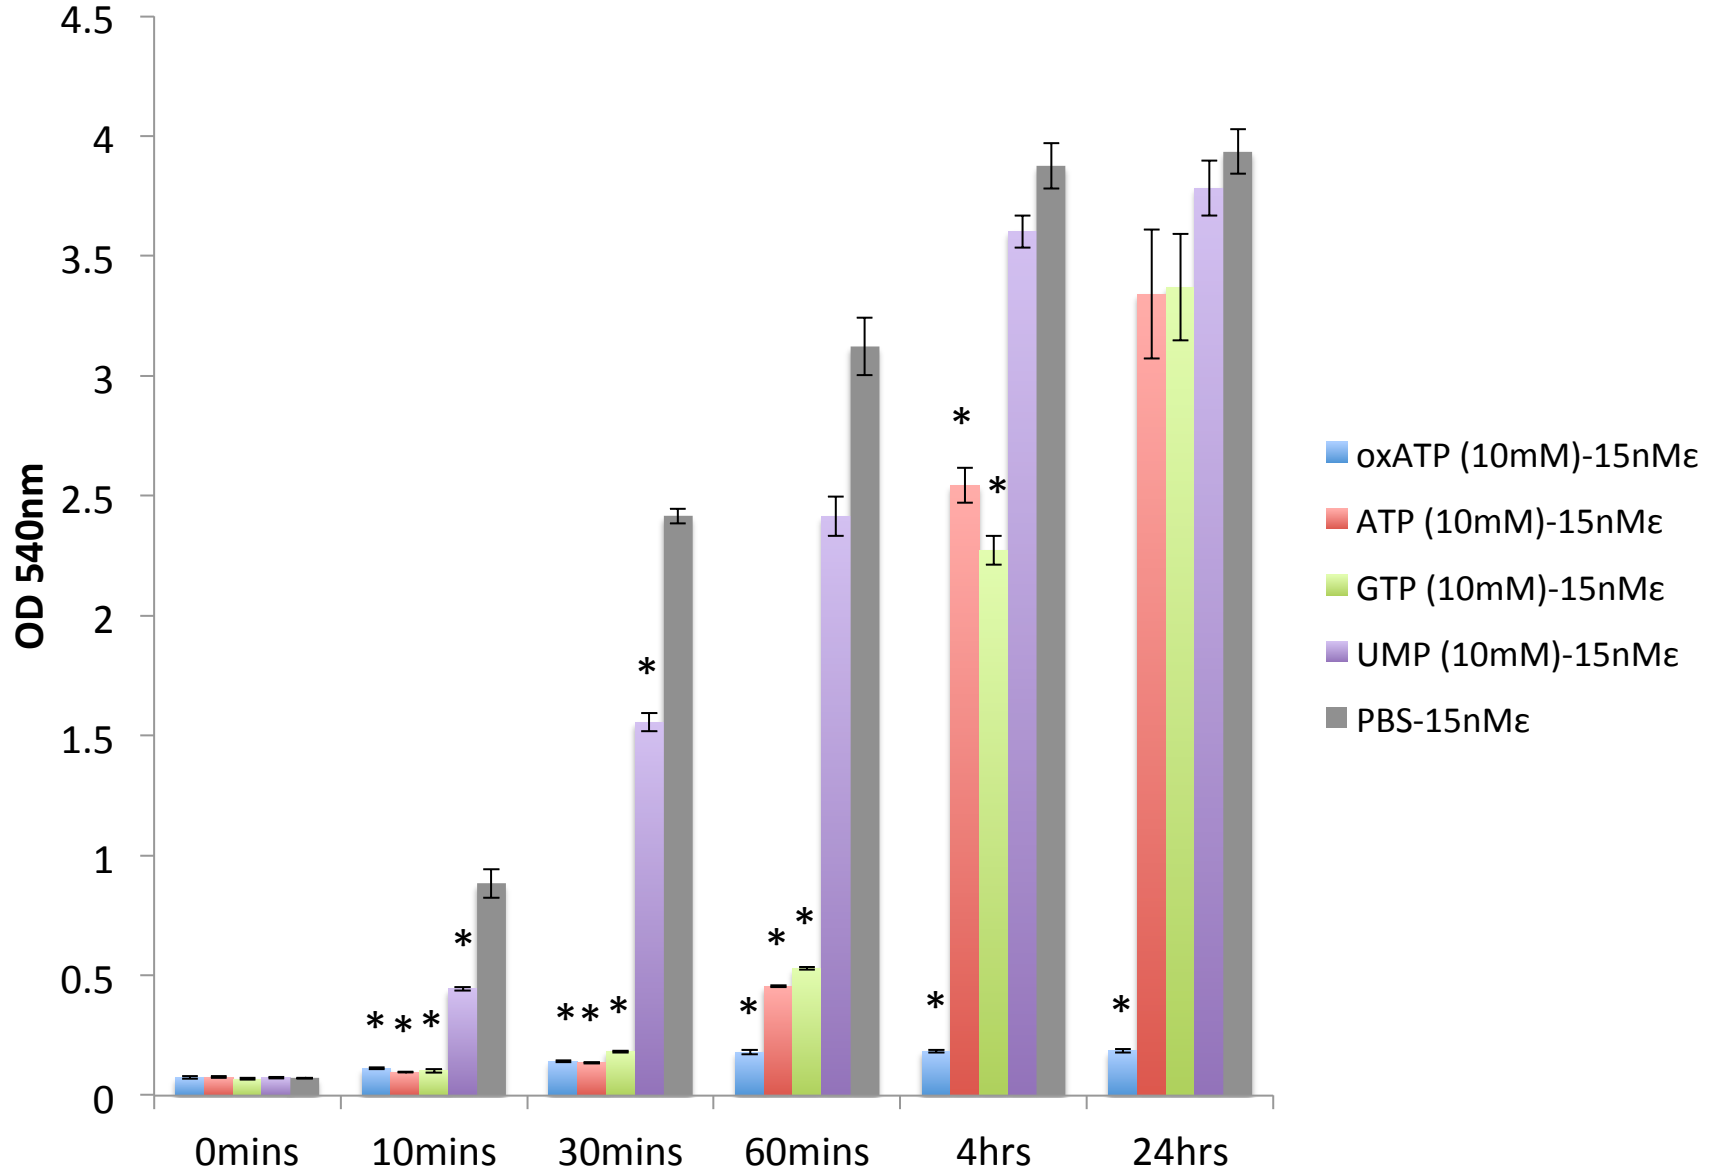

Figure 2b

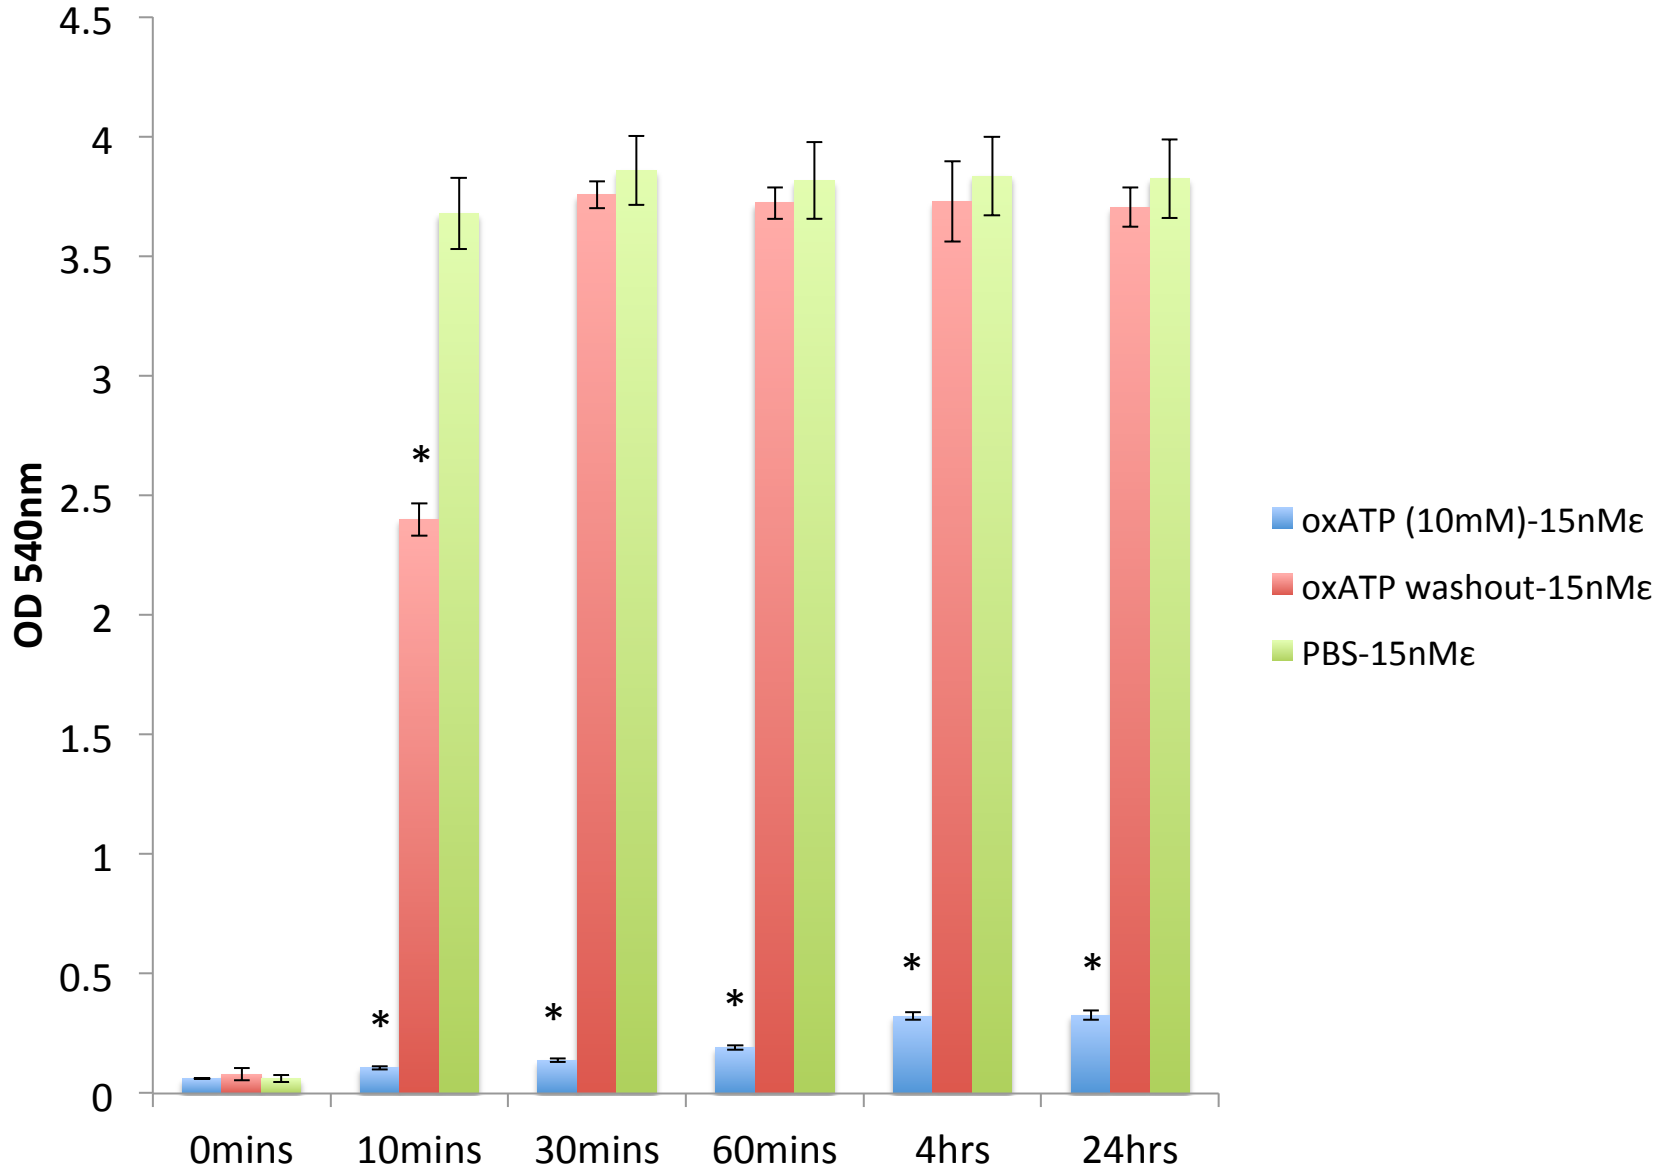

Figure 3a

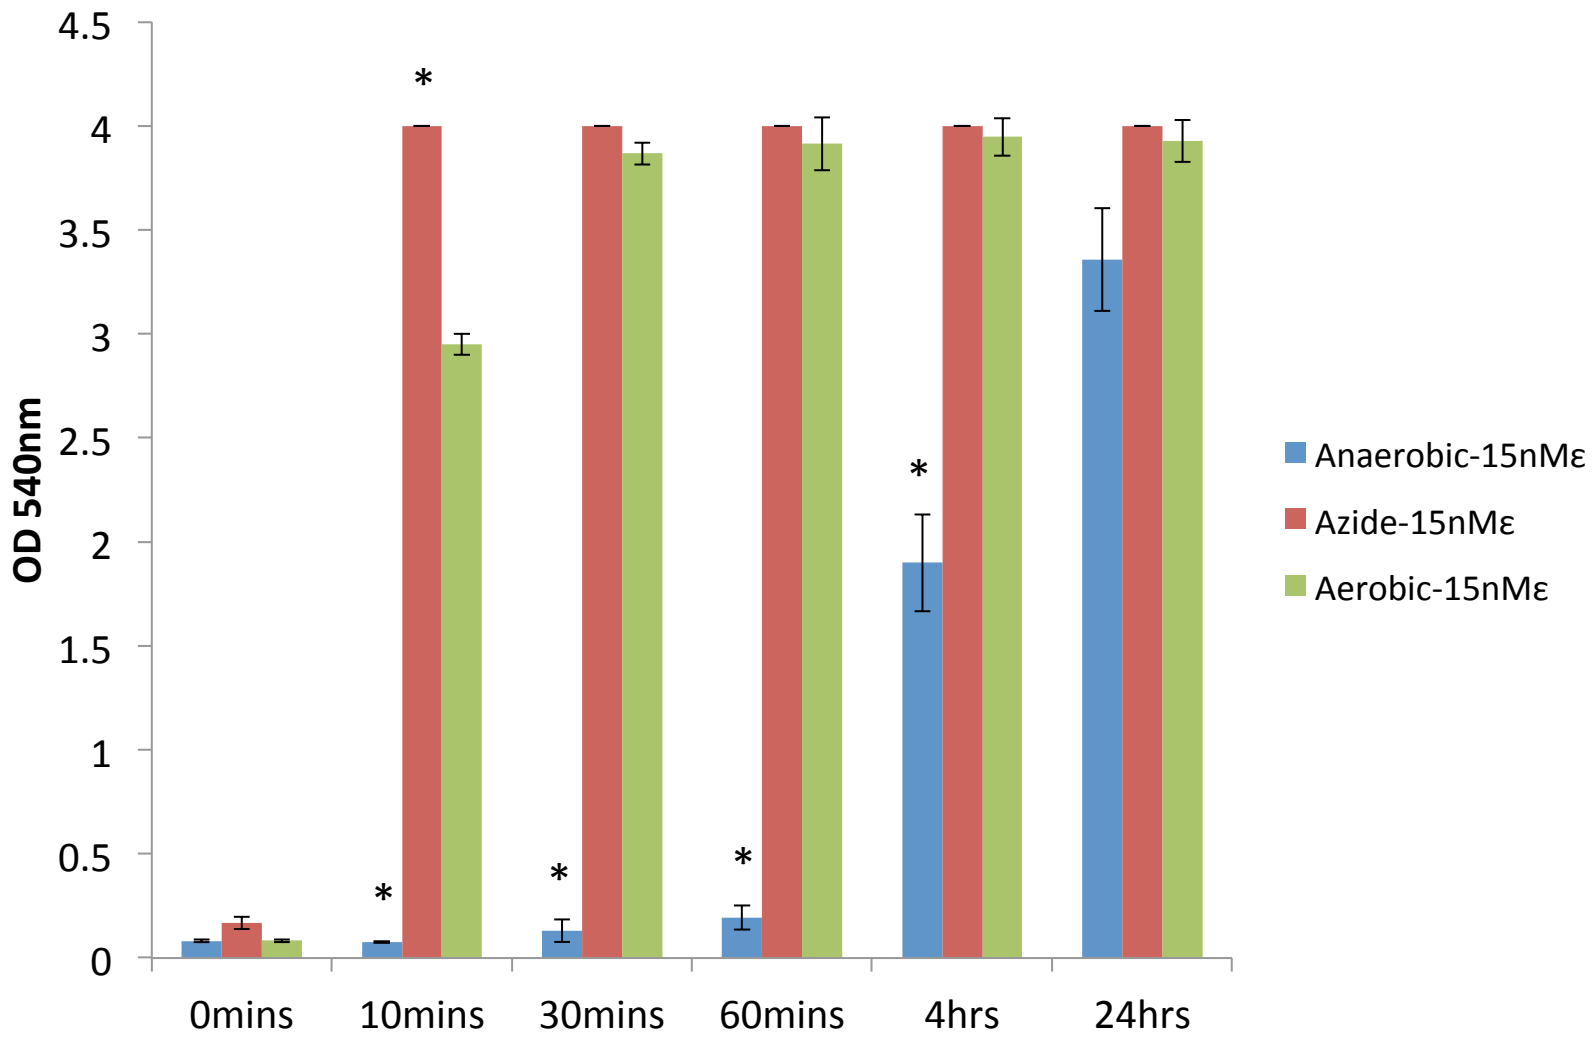

Figure 3b

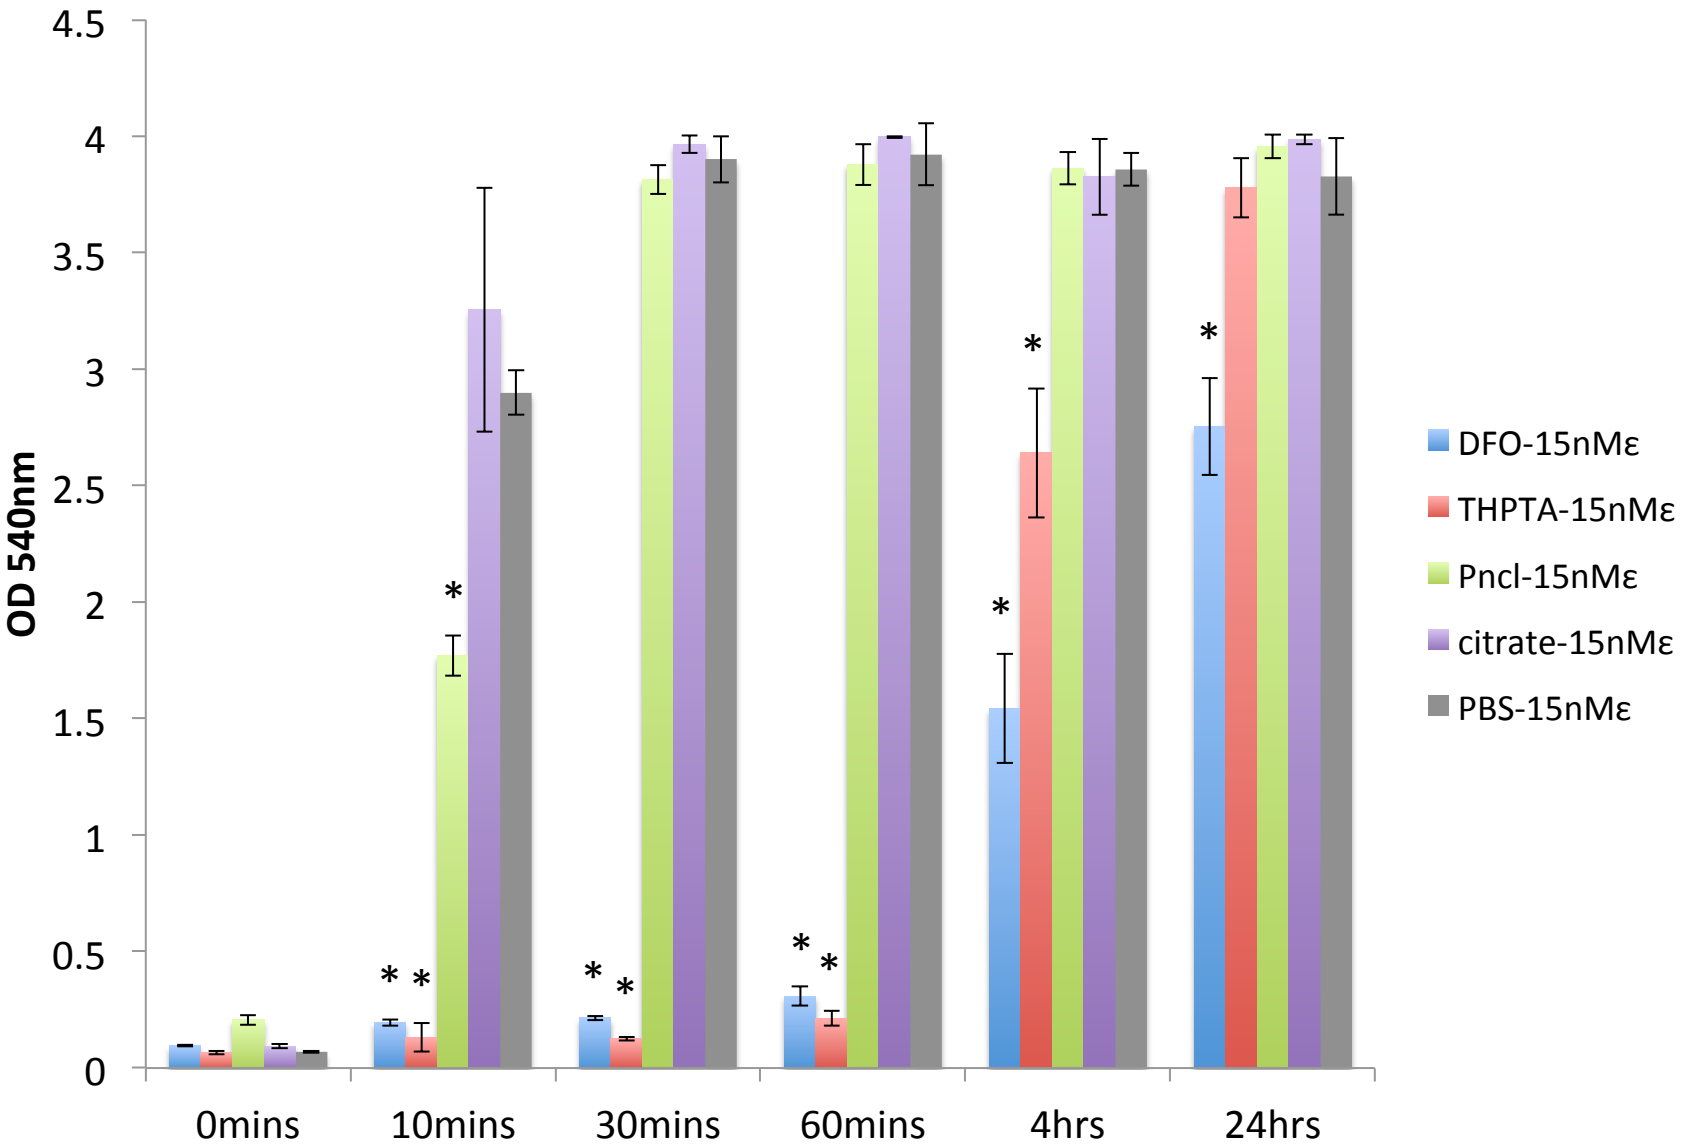

Figure 3c

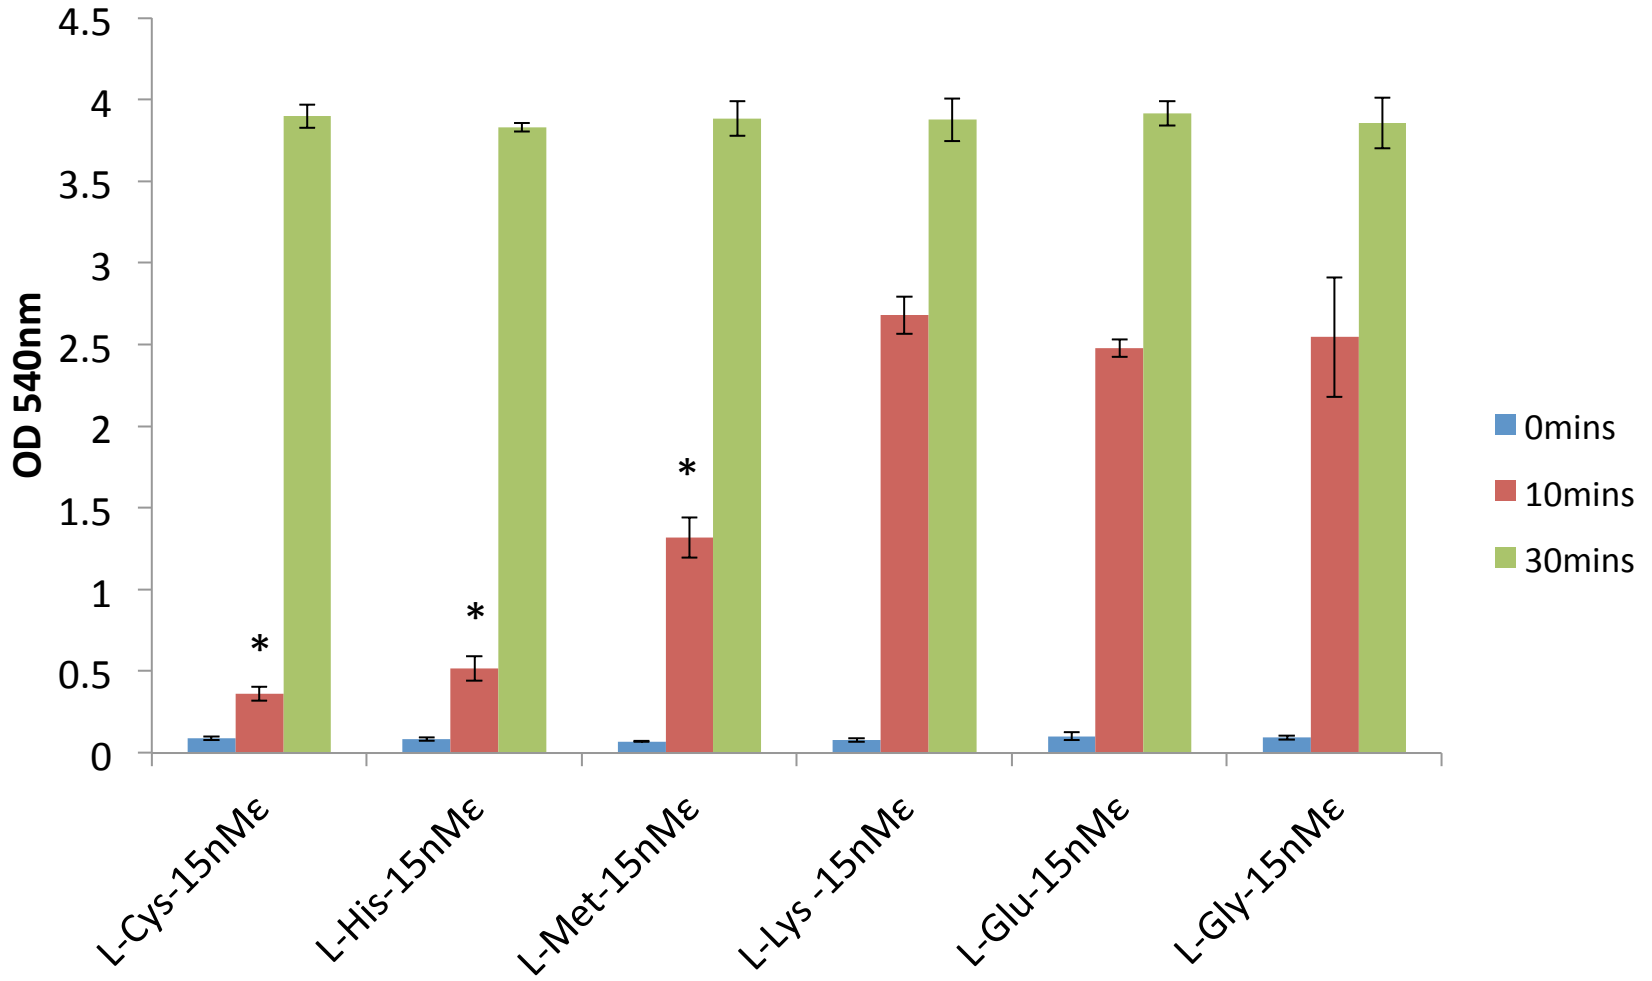

Figure 3d

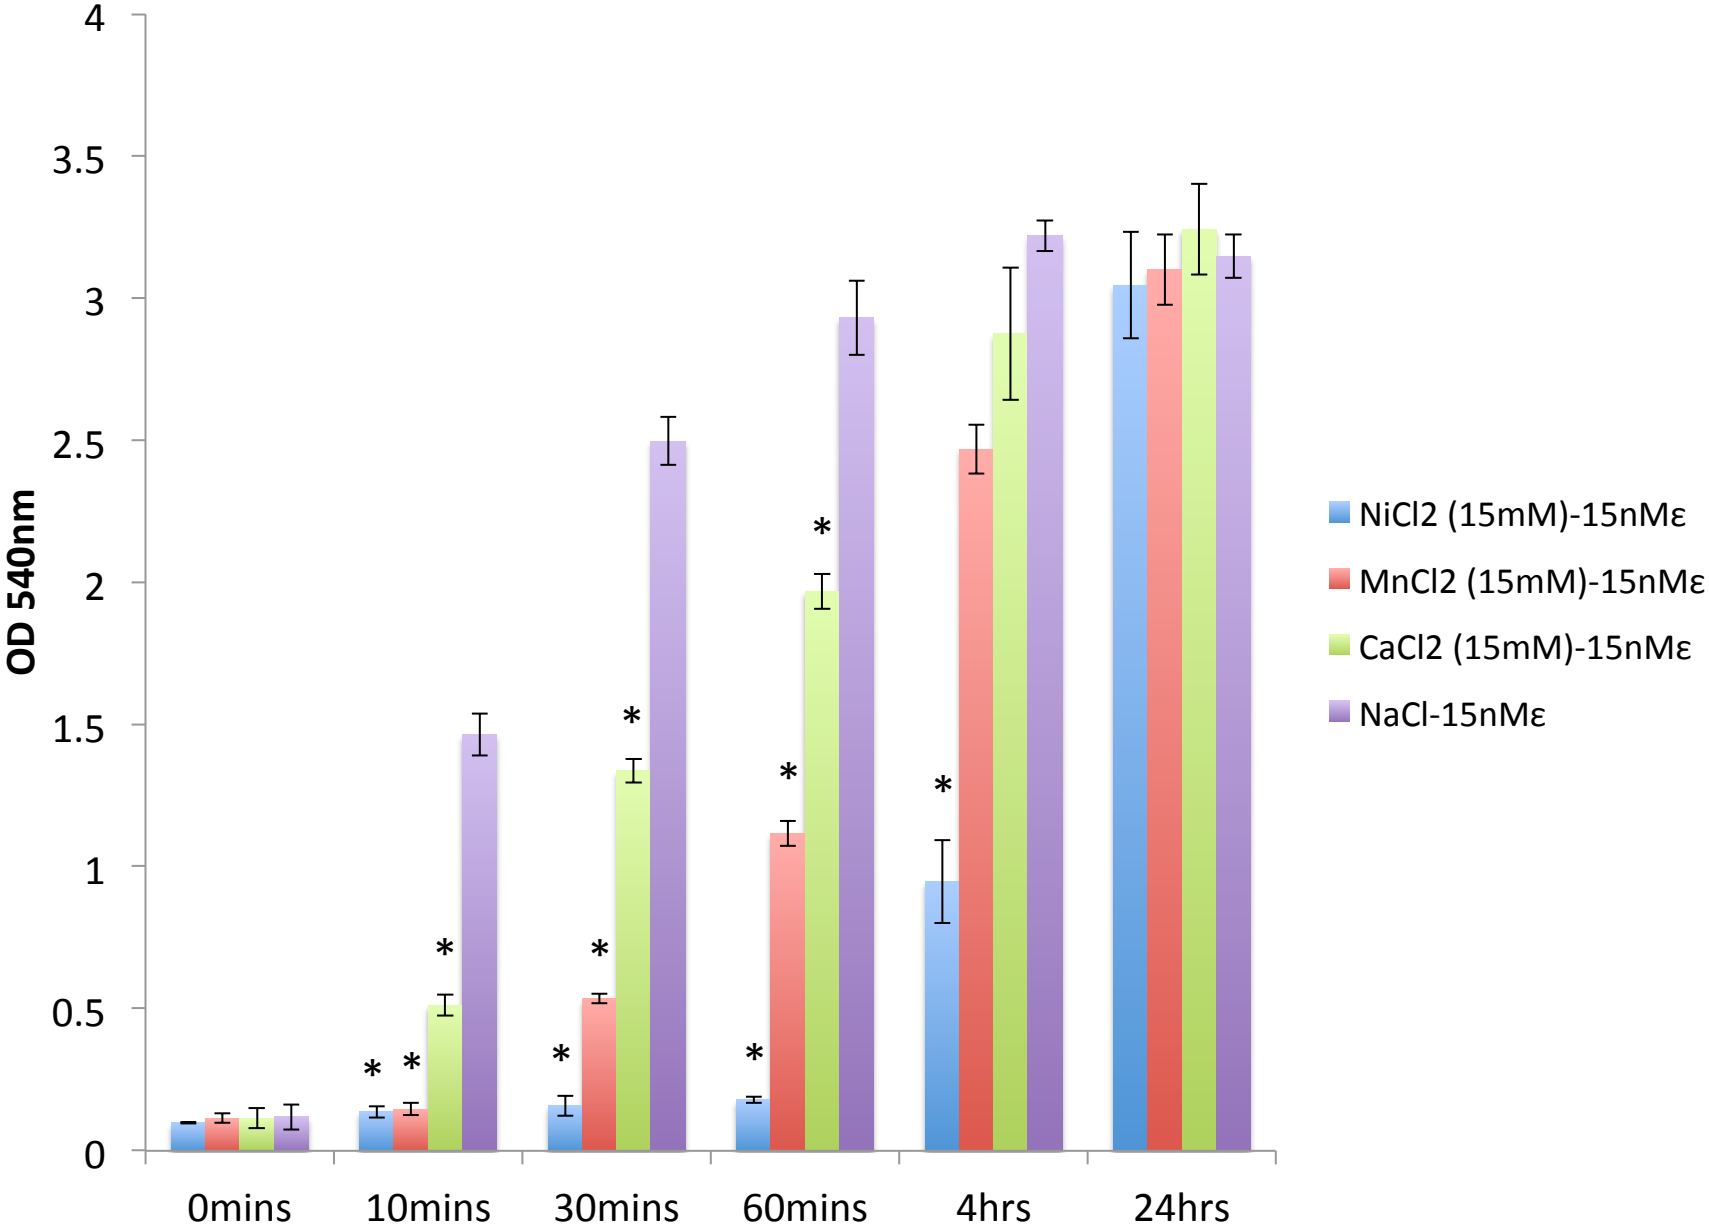



Figure 4a

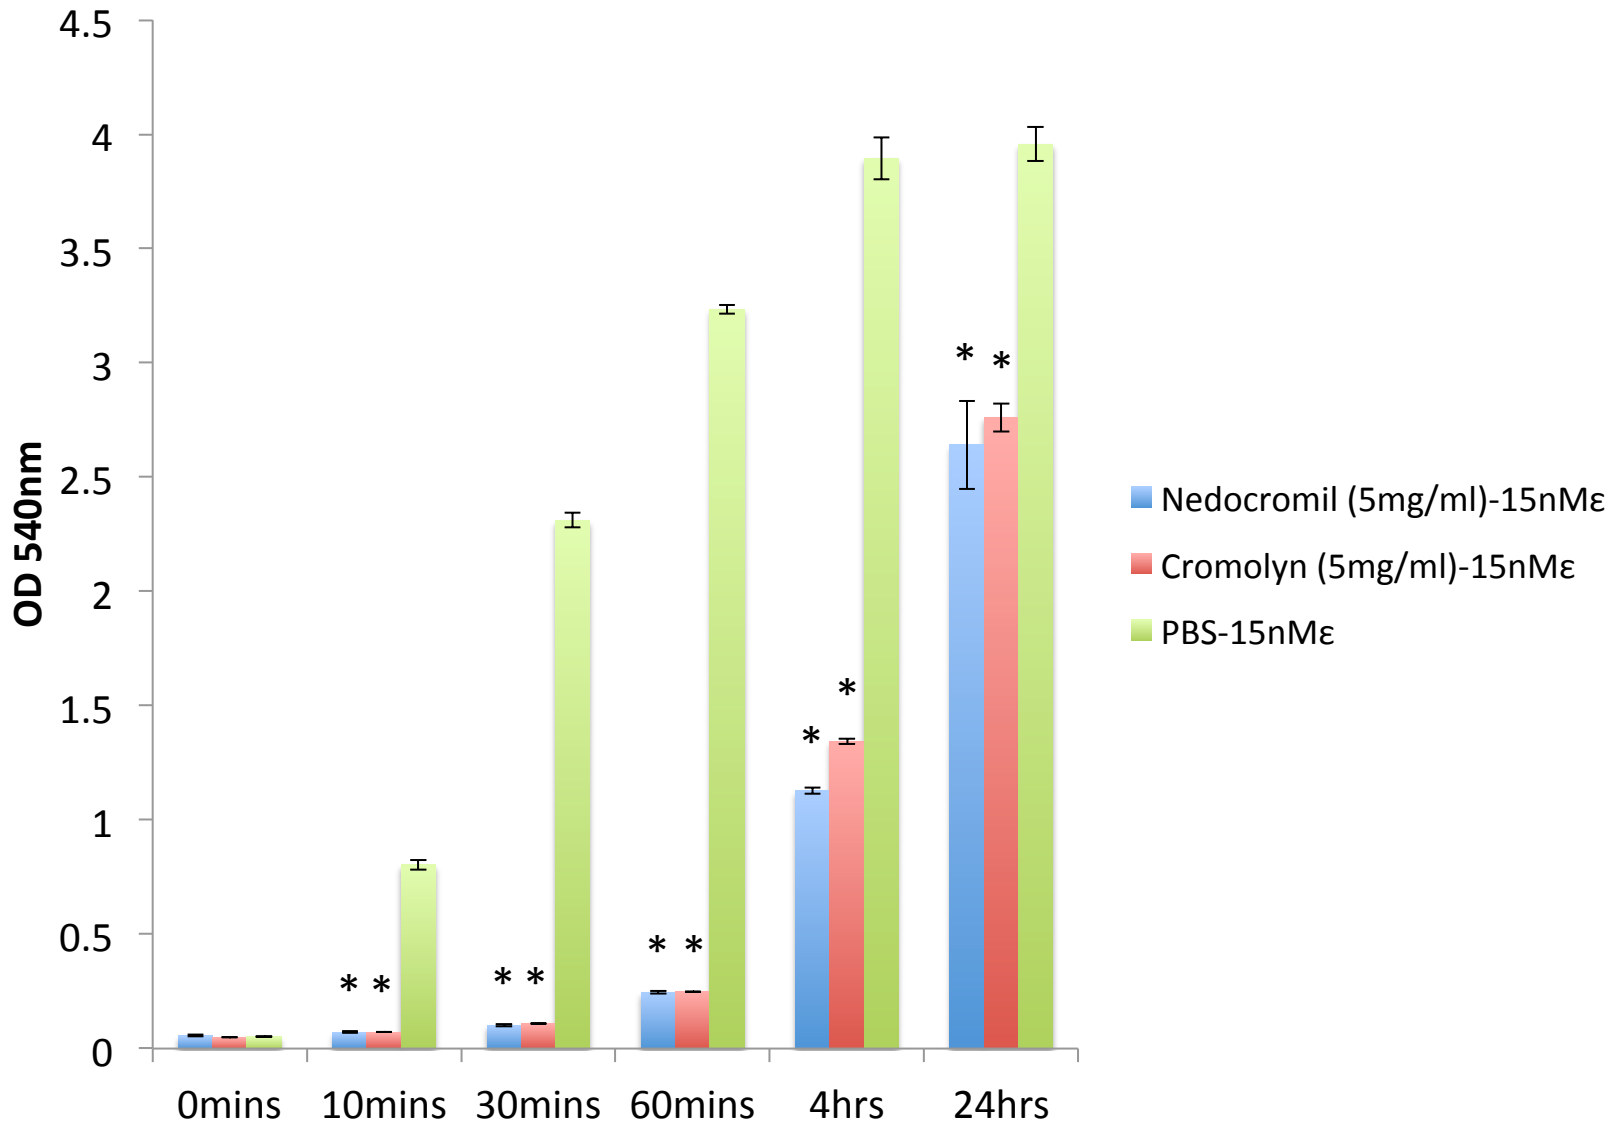

Figure 4b

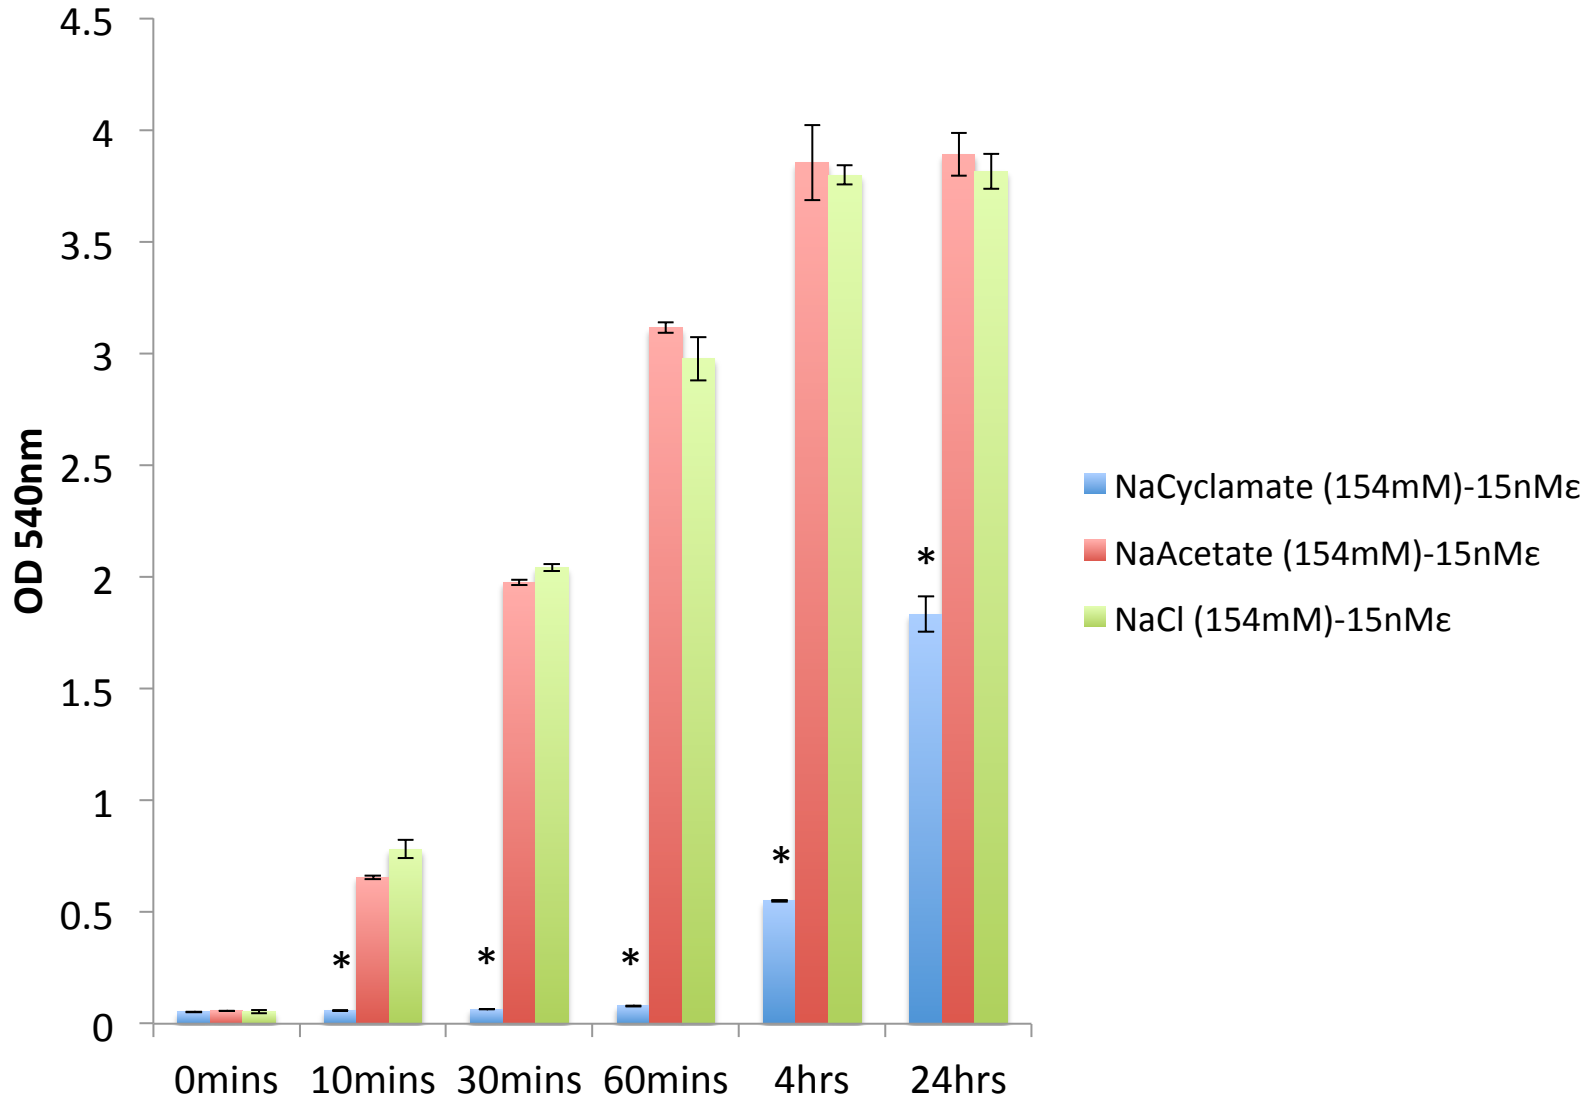

Figure 4c

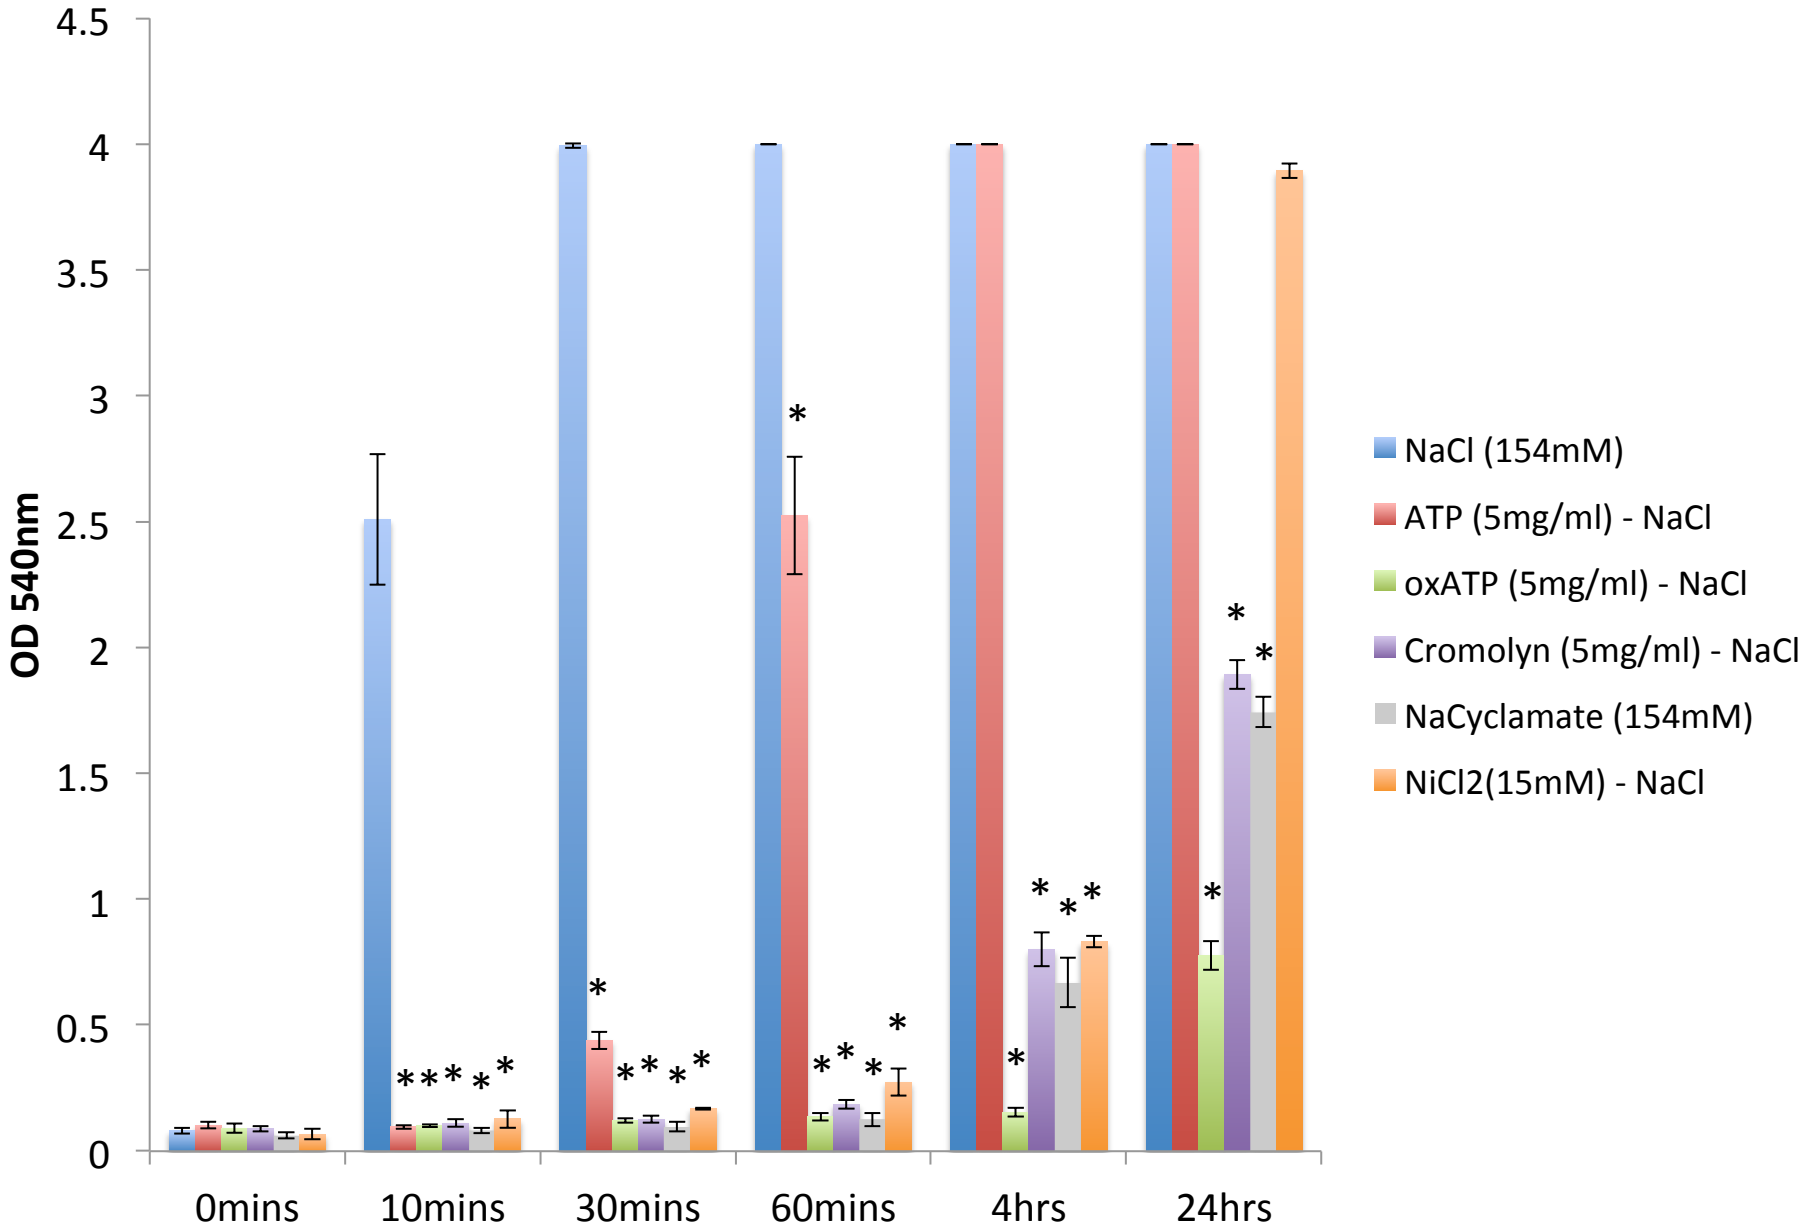

Figure 4d

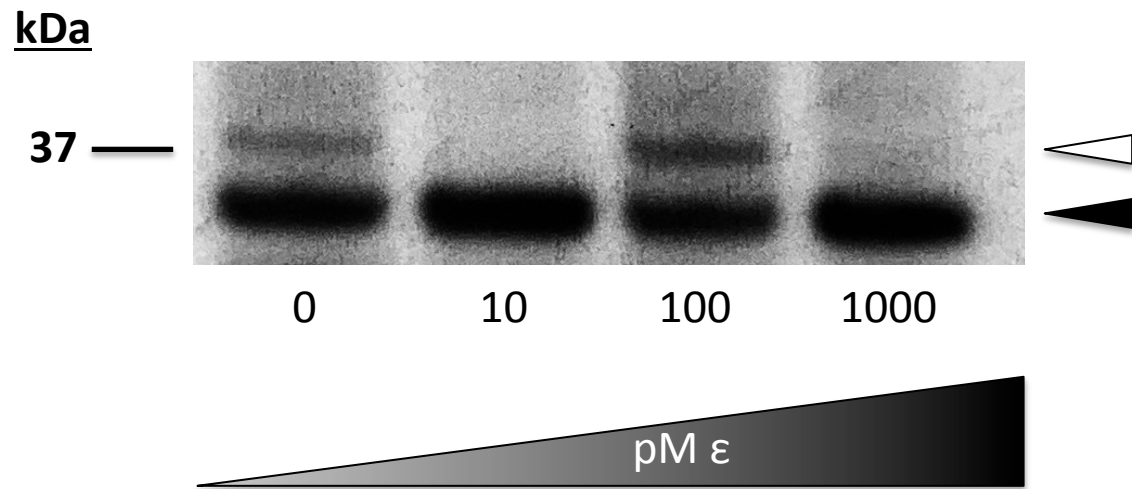



Figure 5a

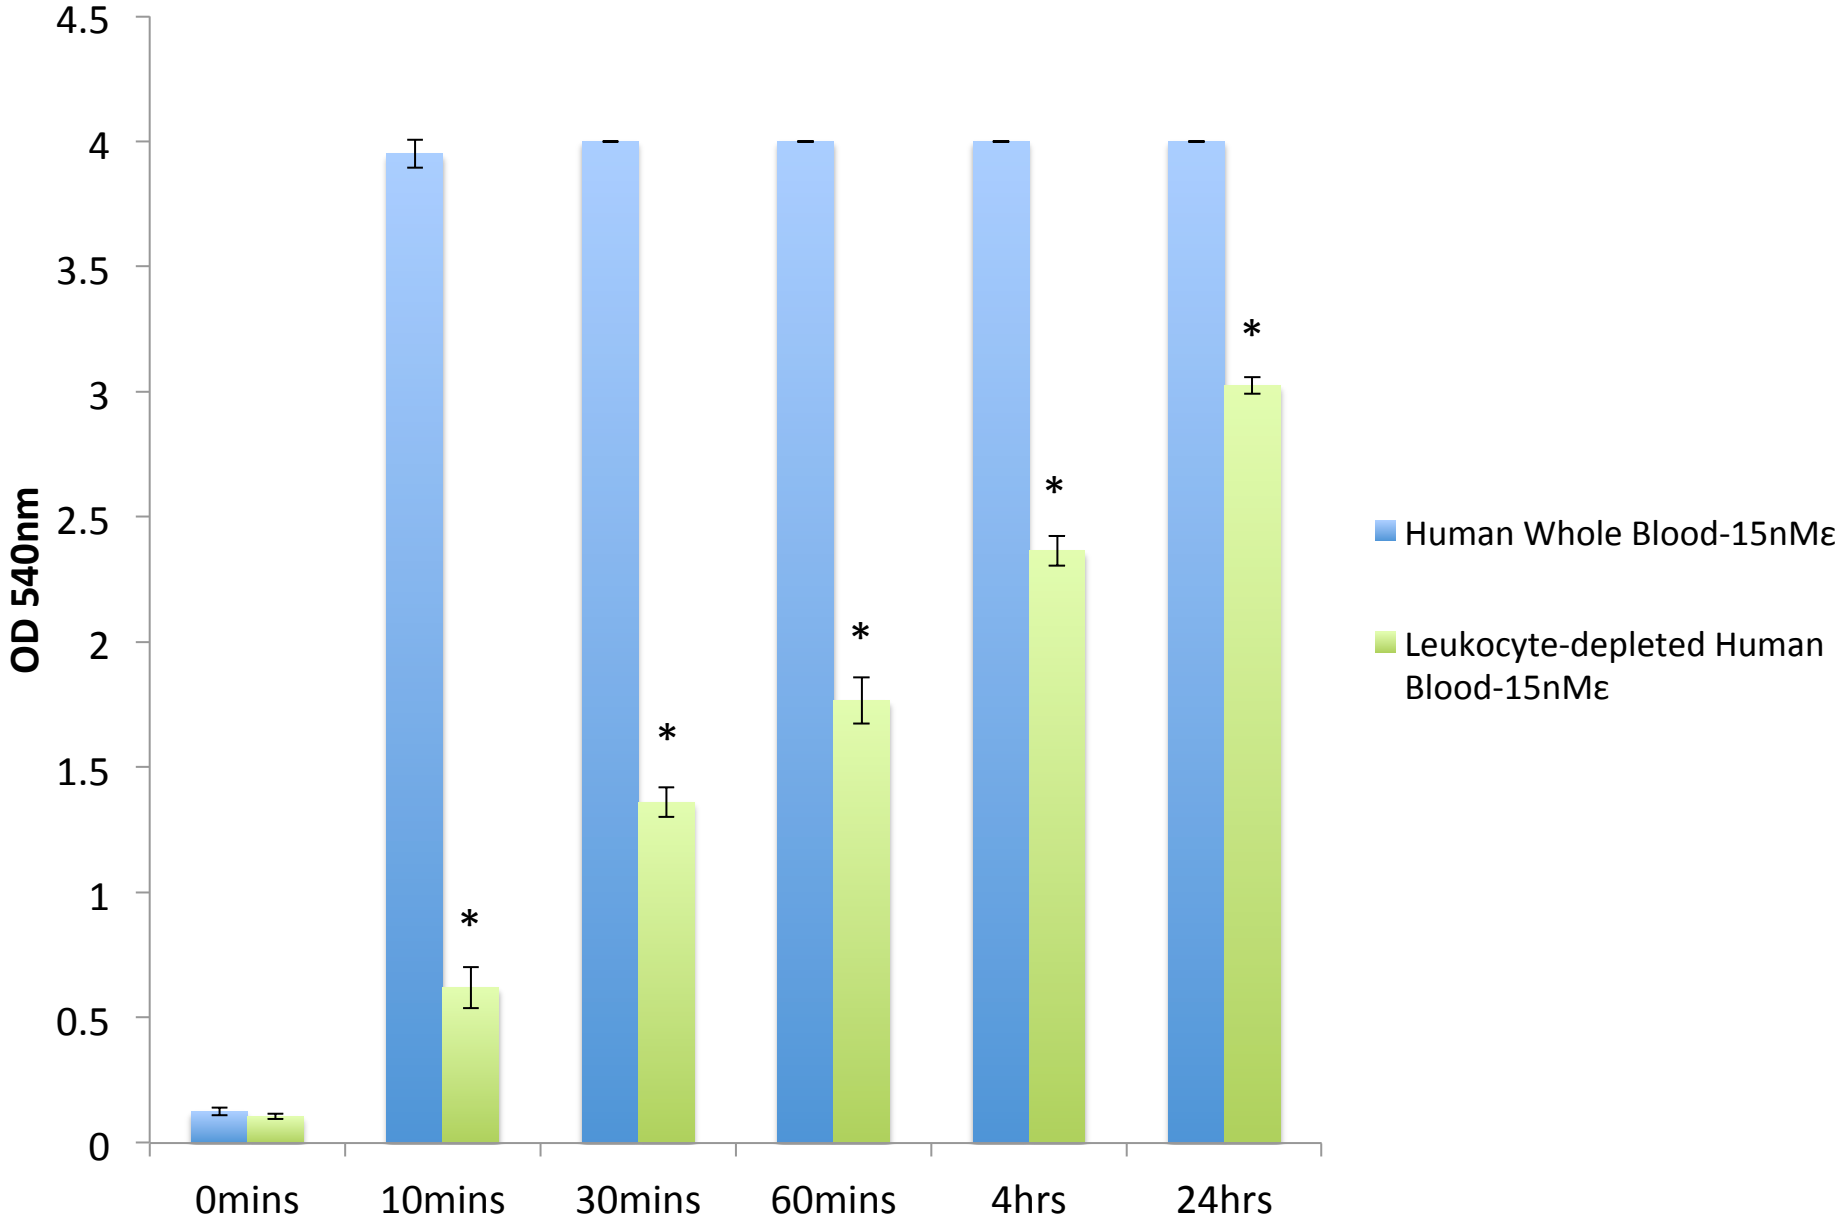

Figure 5b

B cells

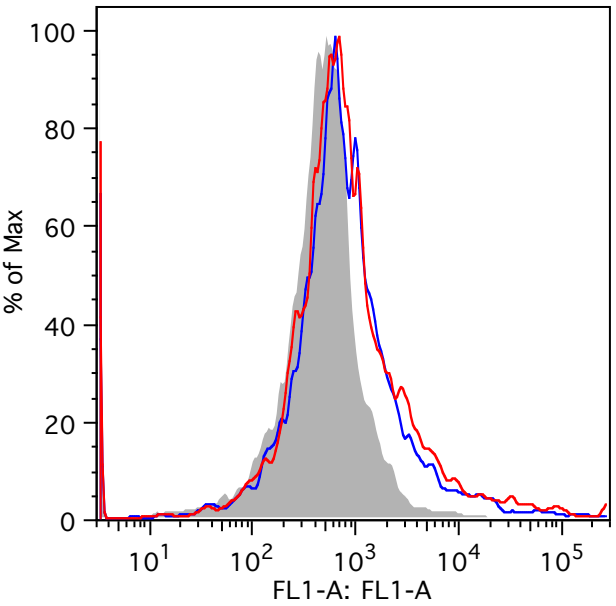

CD4<sup>+</sup> T cells

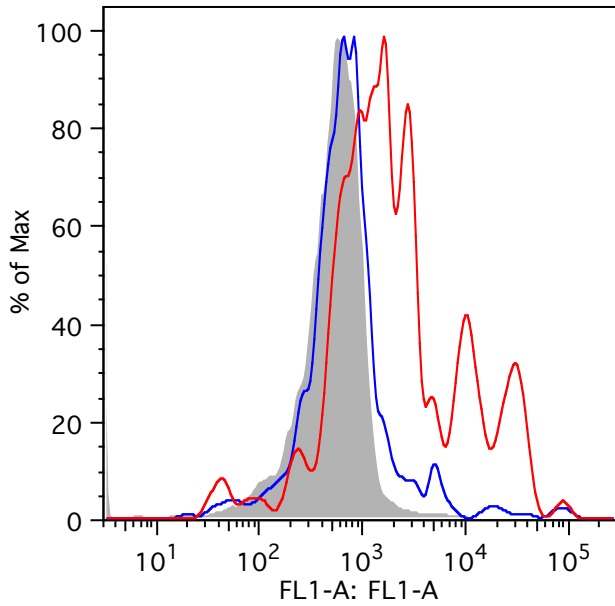

RBCs

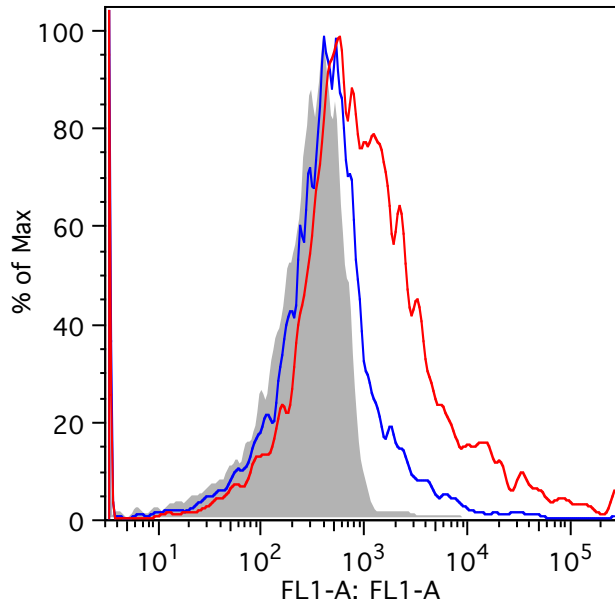

- 50nM protoETX
- 0nM protoETX
- Unstained

Figure 5c

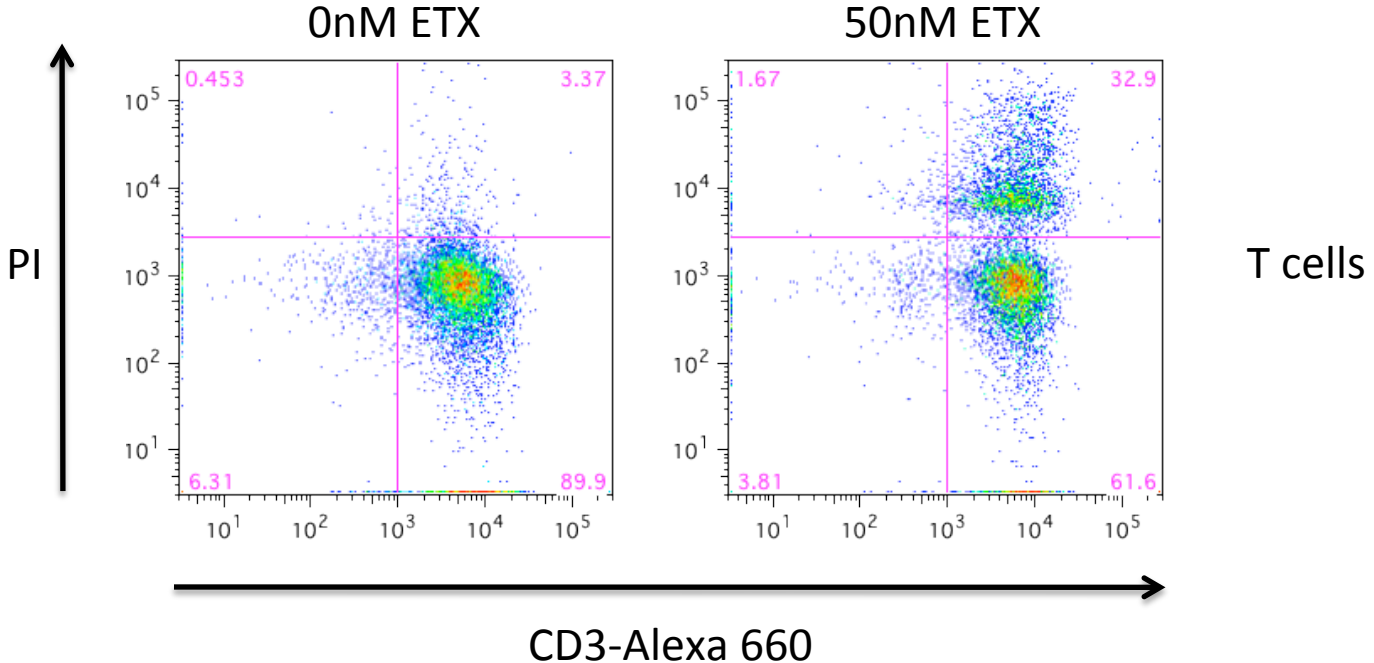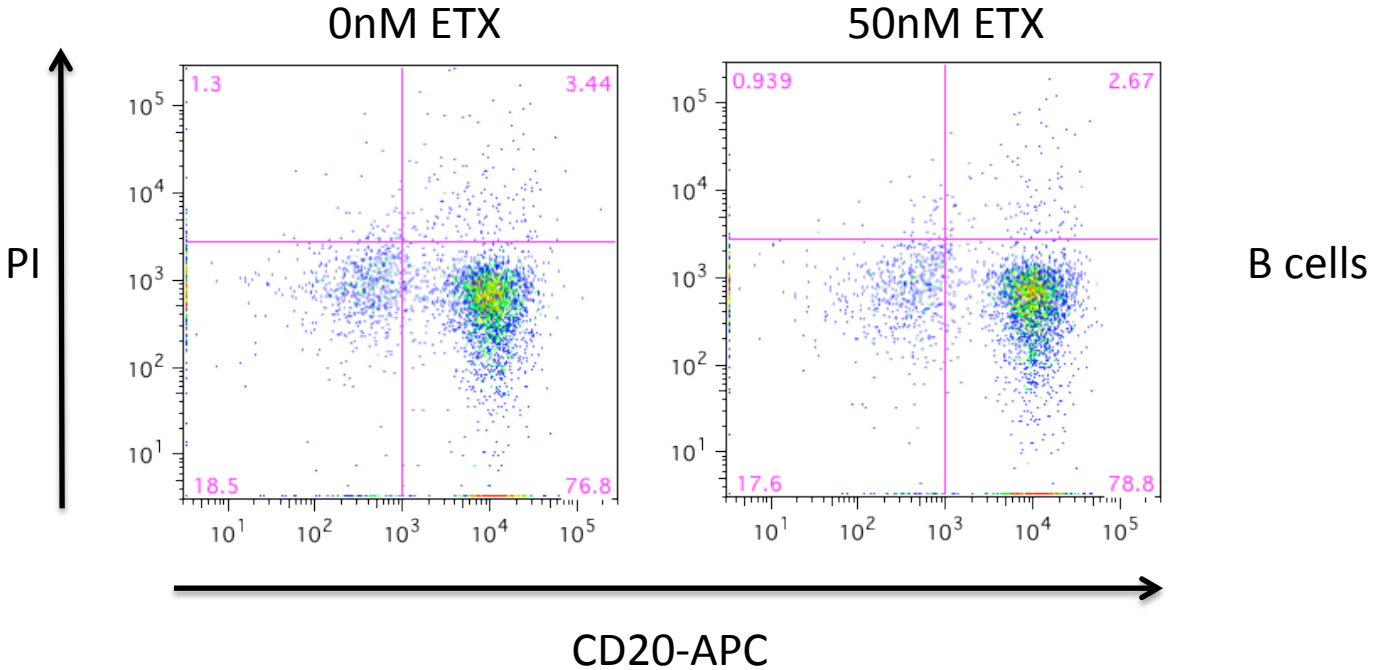



Figure 5d

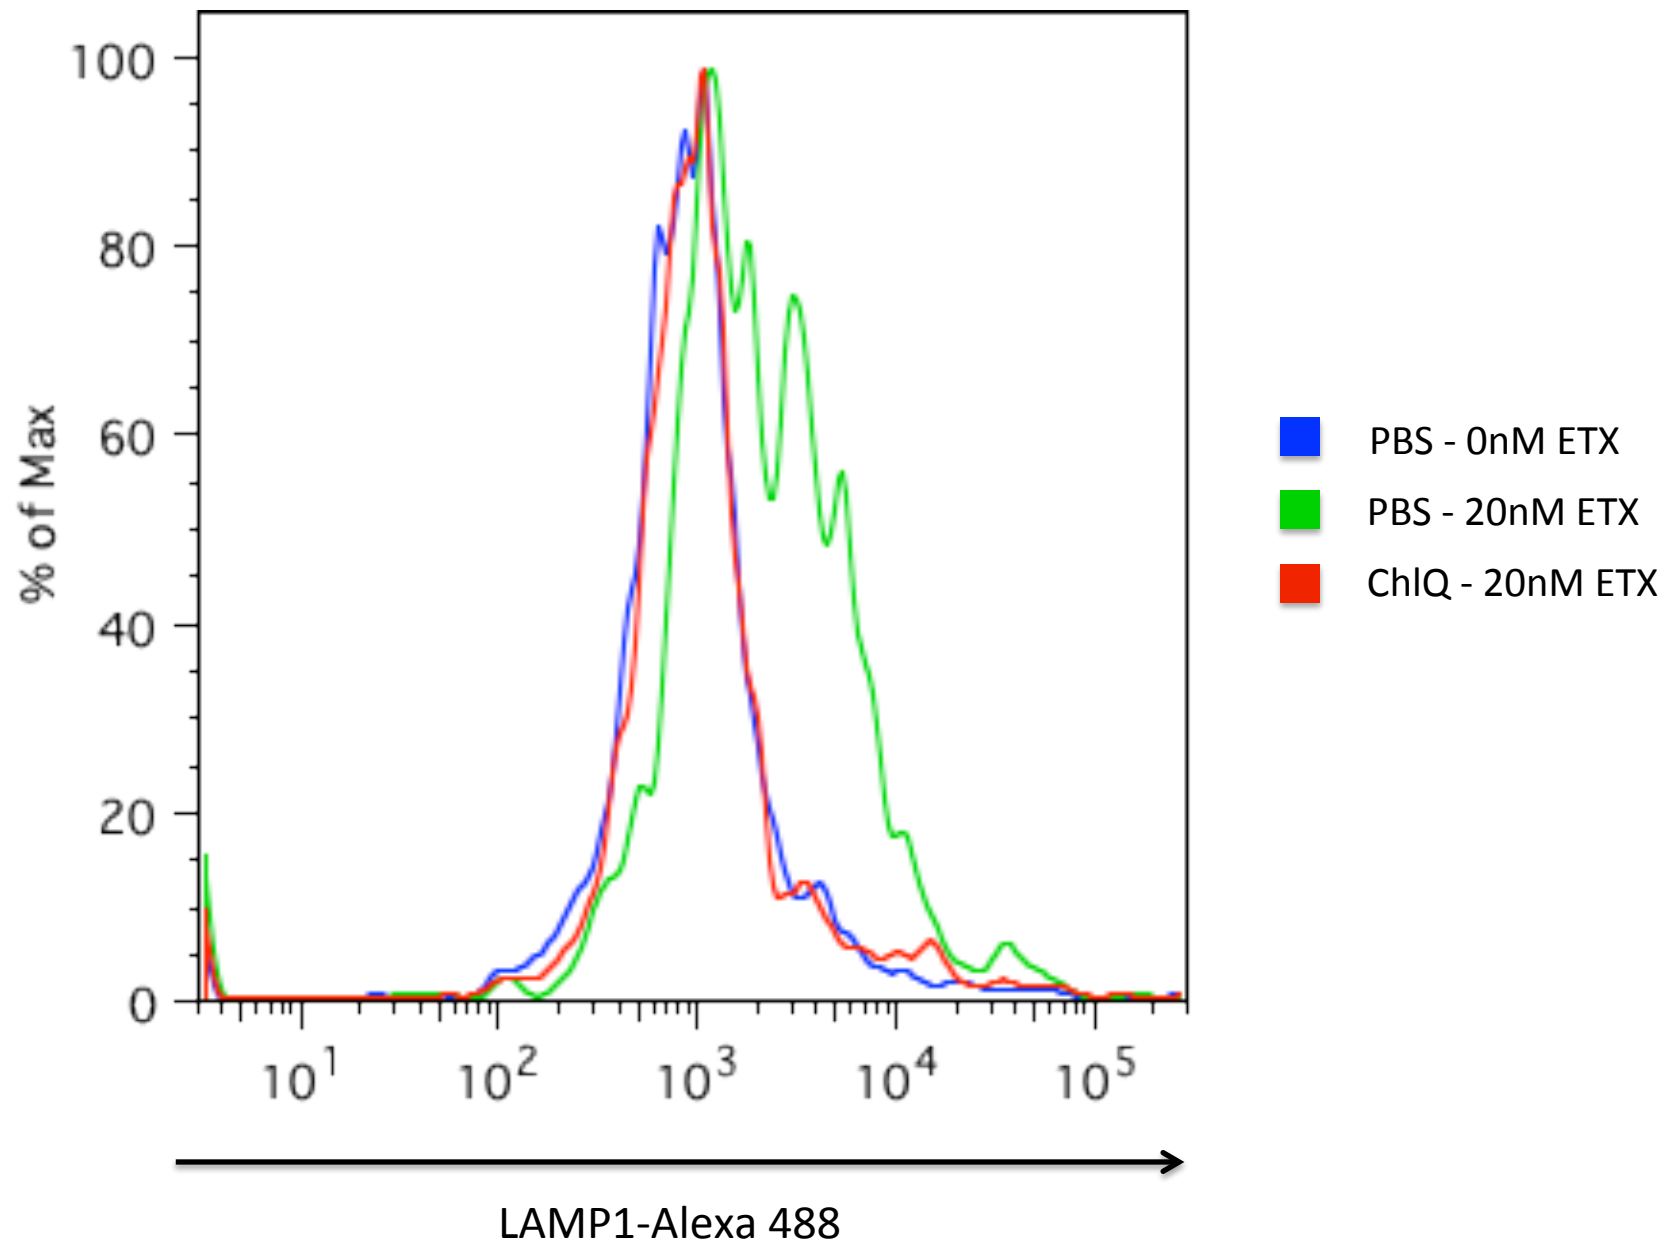

Figure 5e

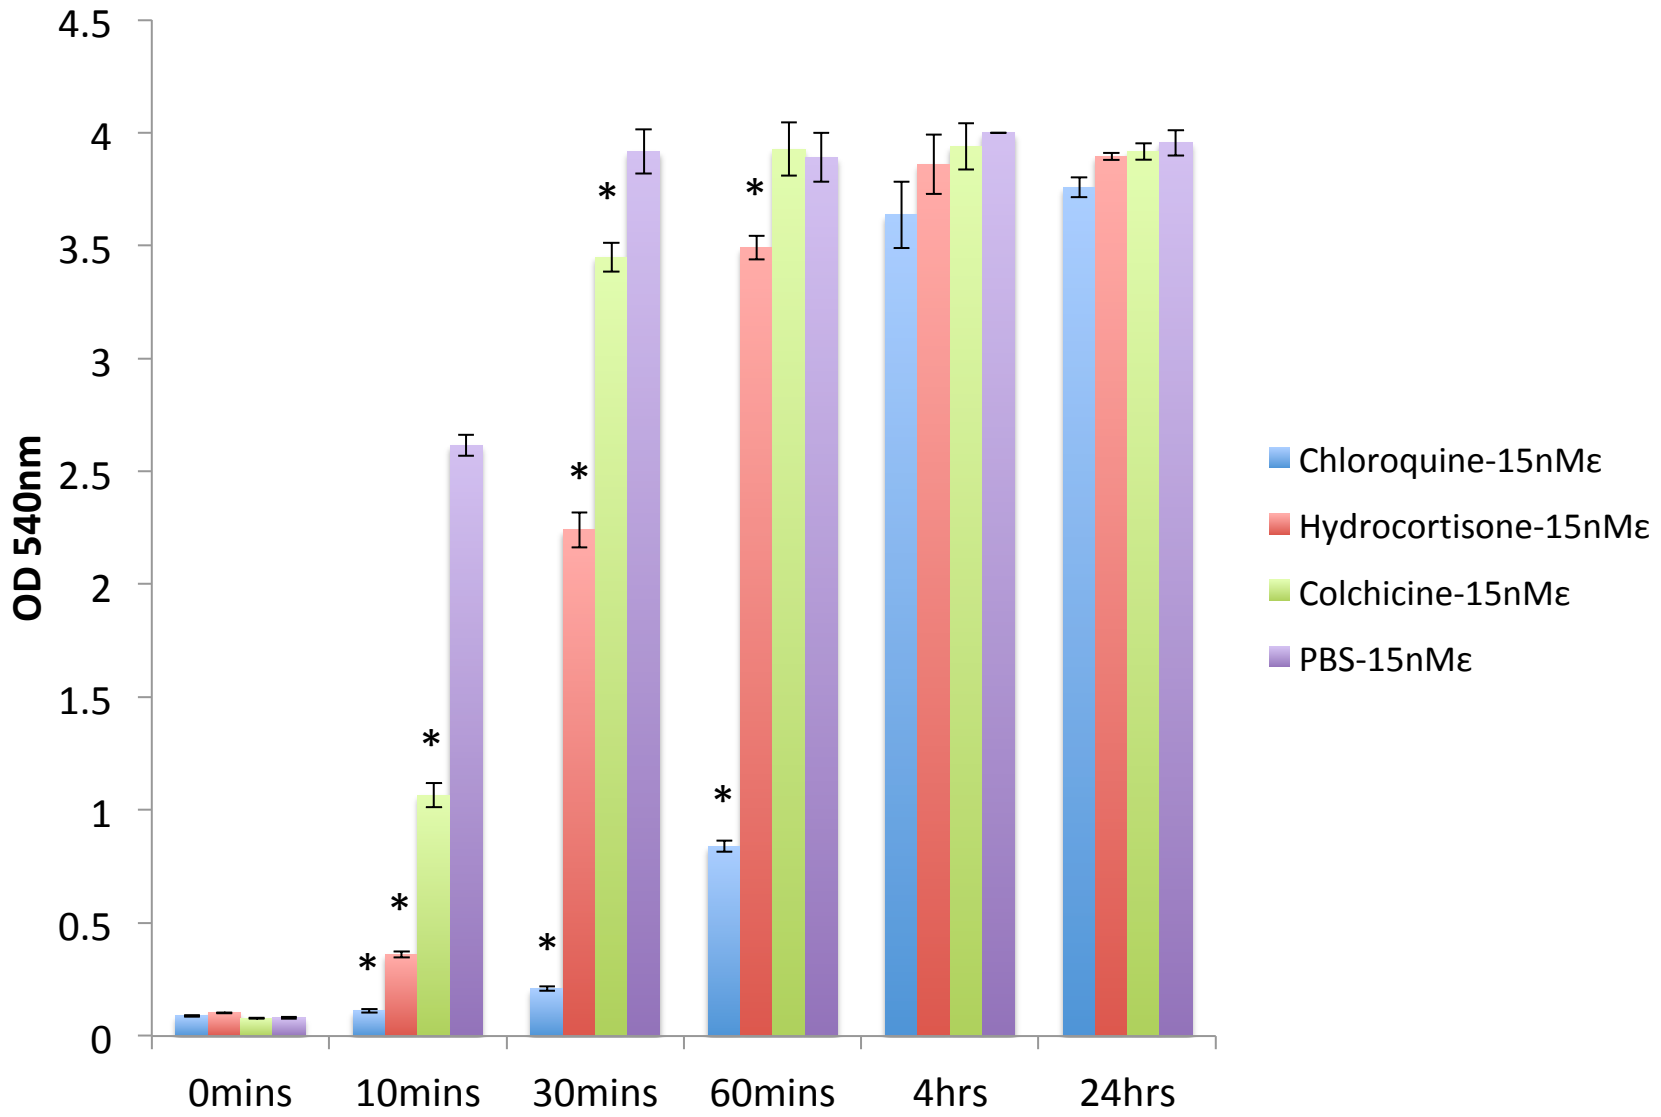

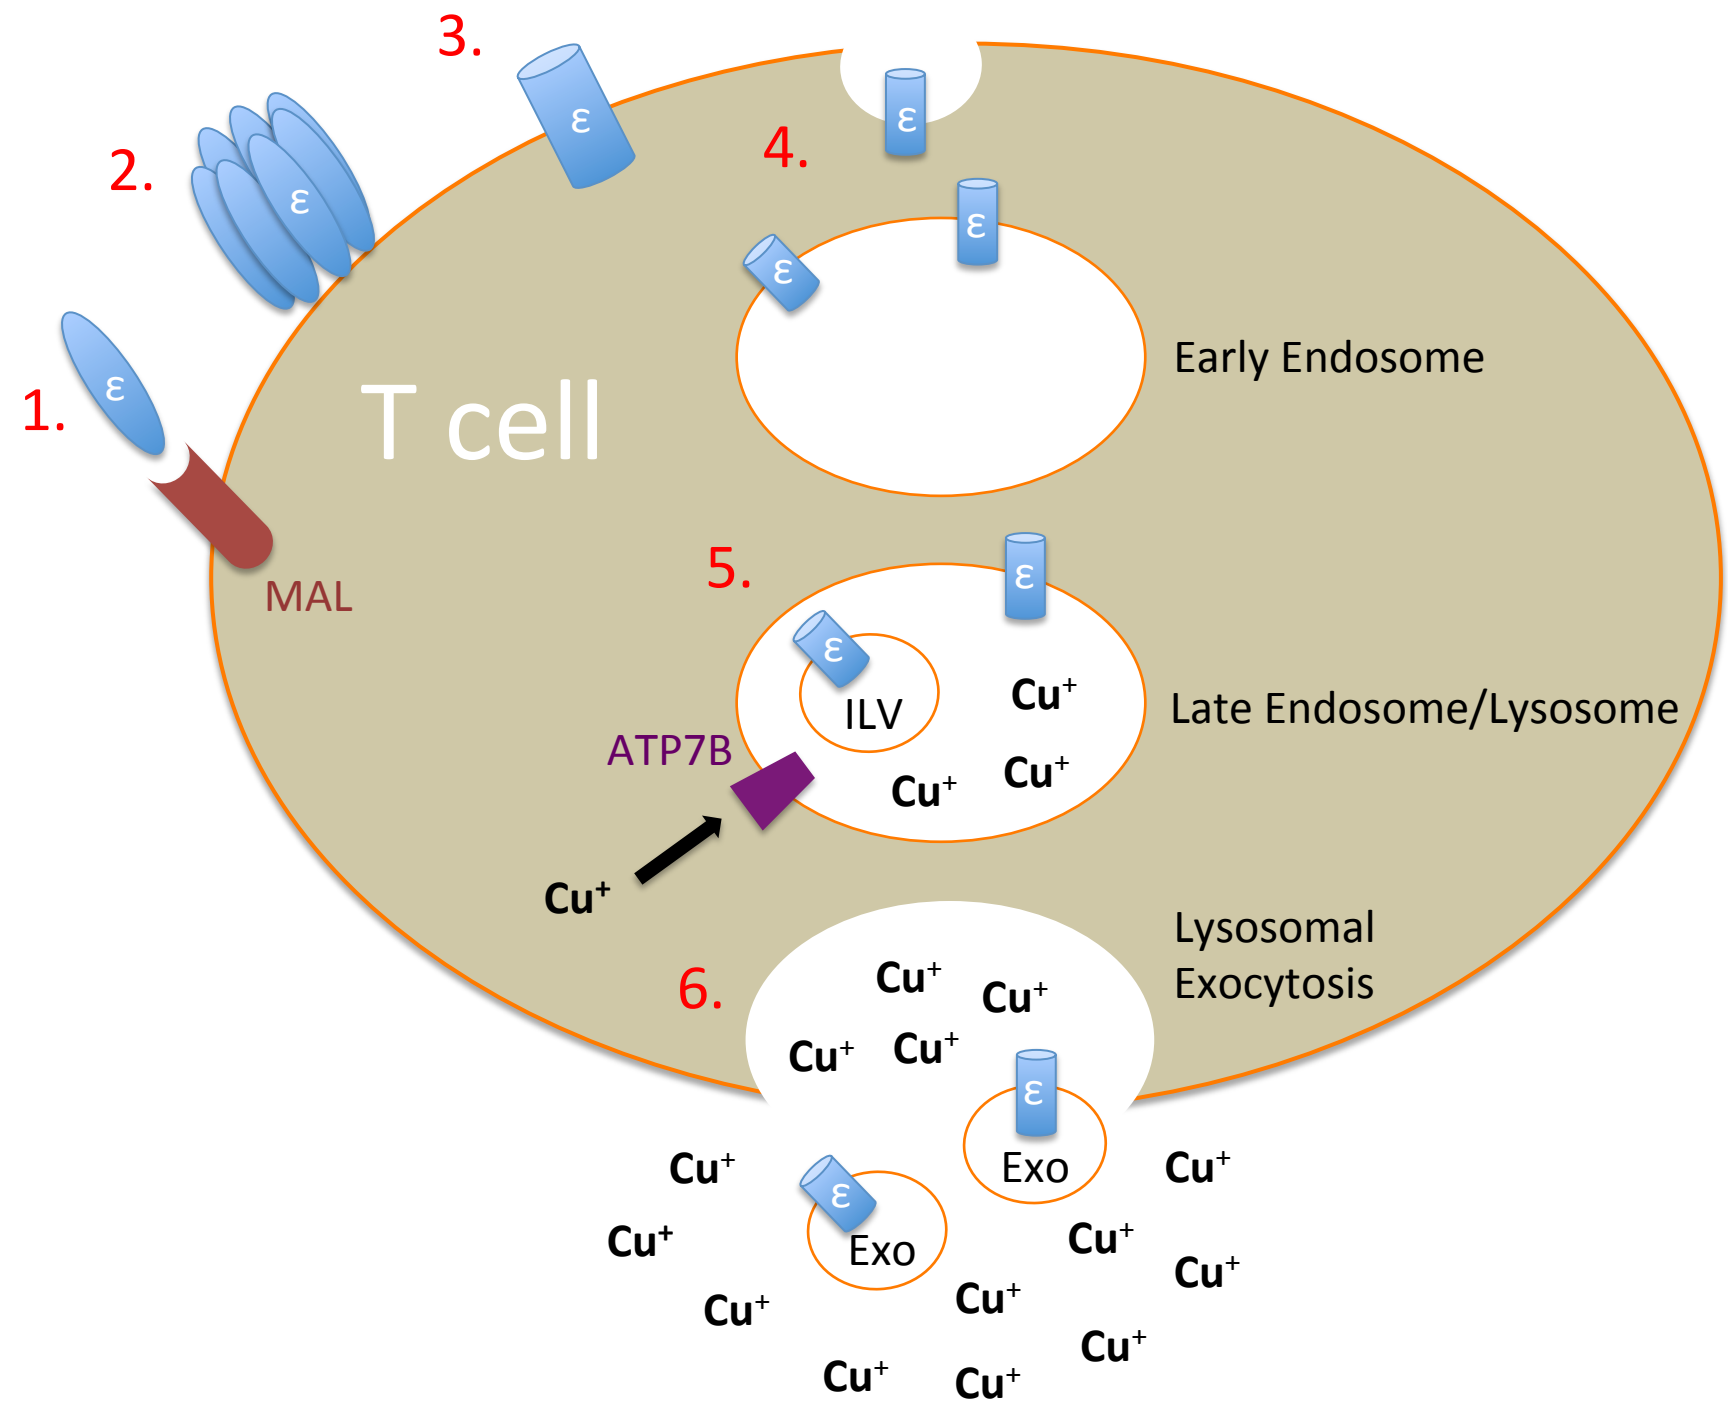

Figure 6

Figure 7

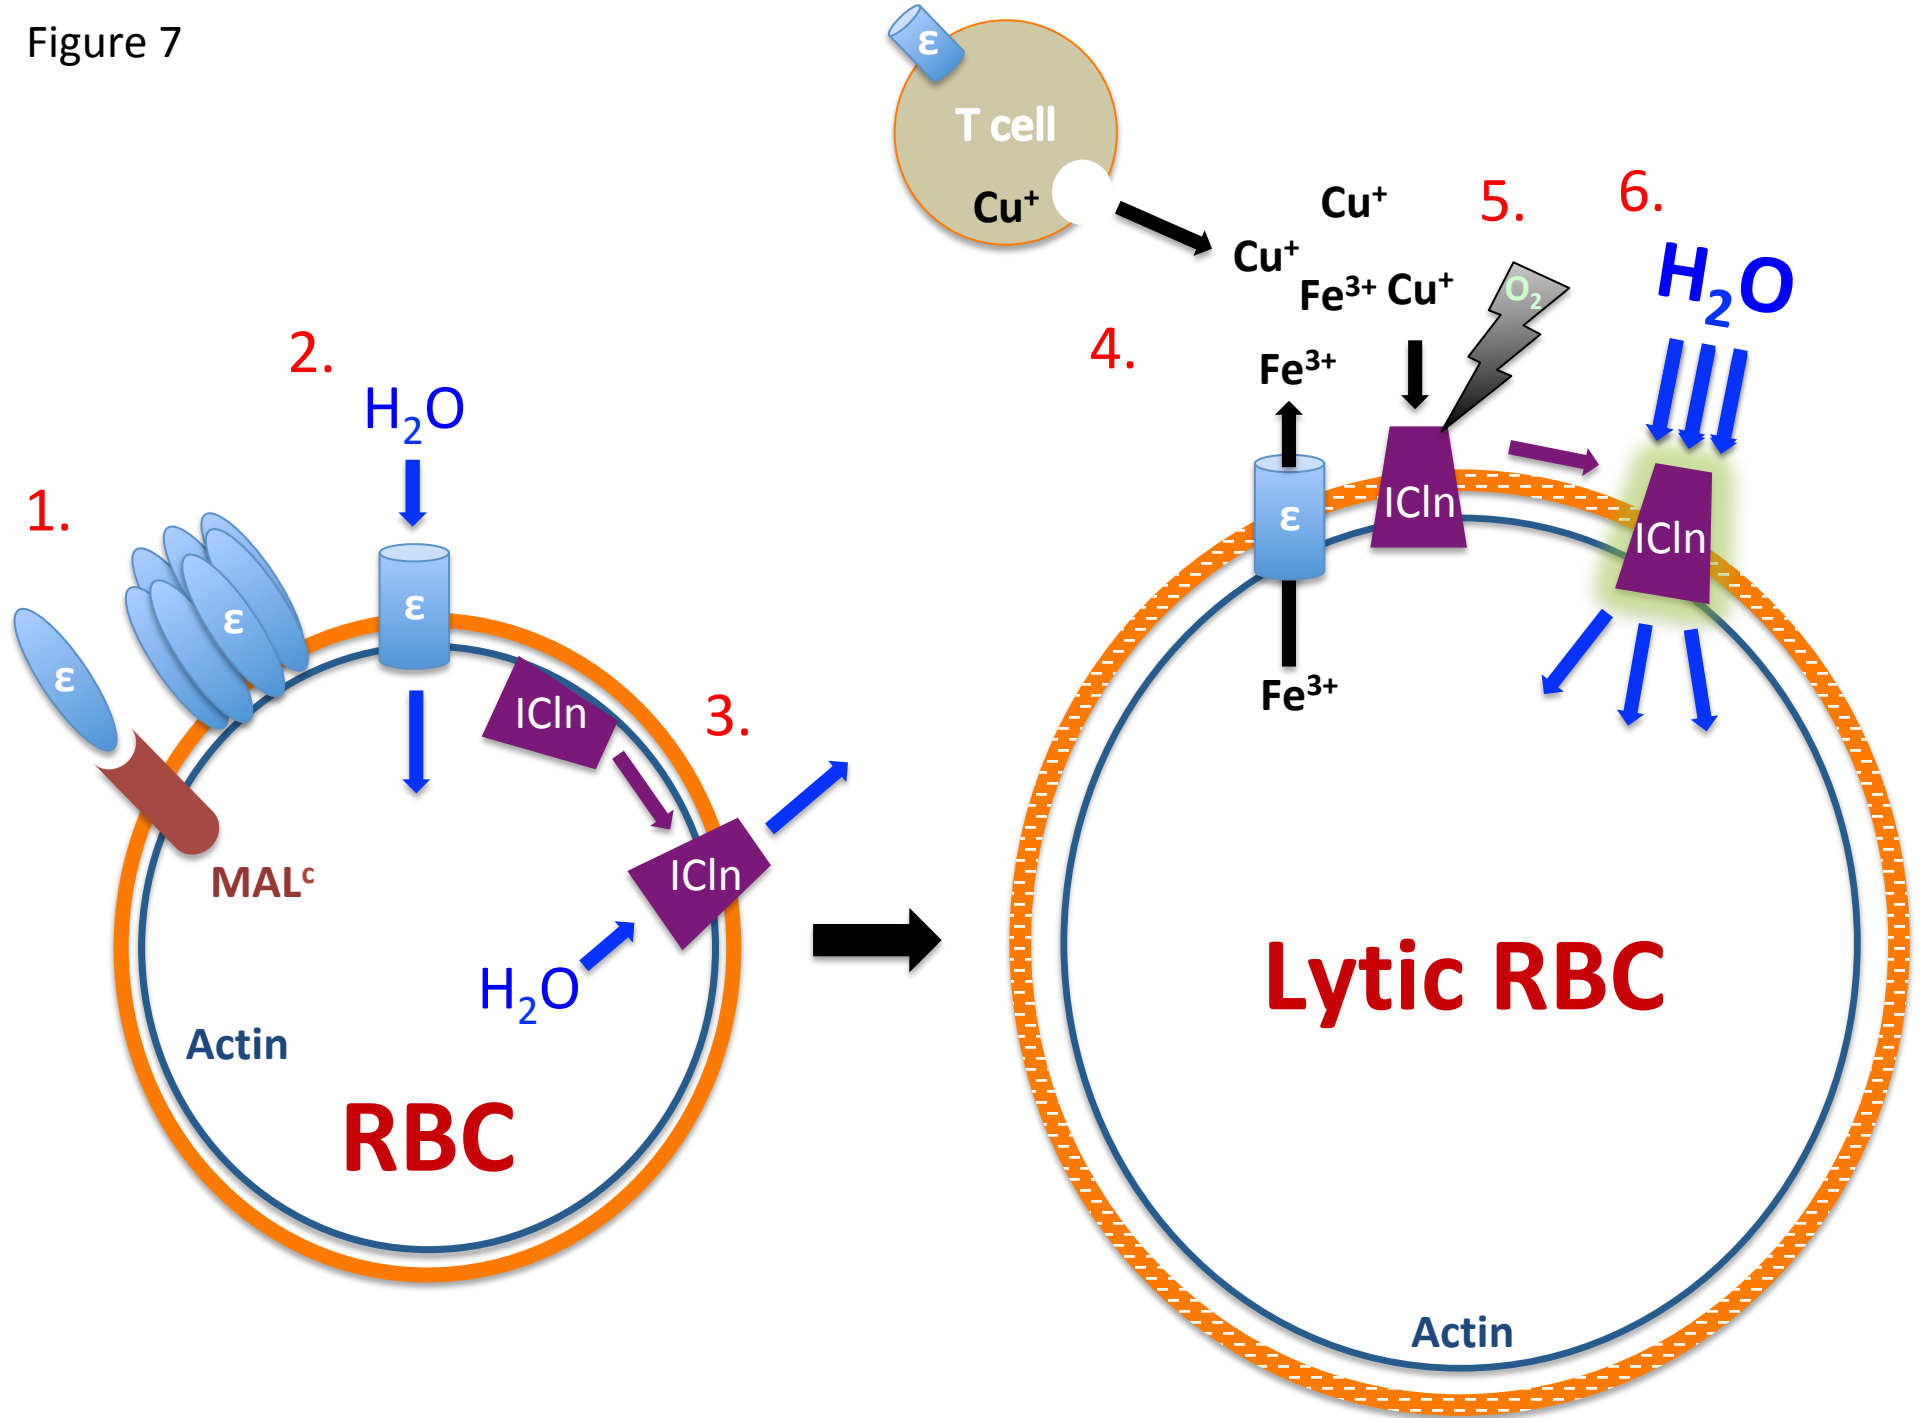

Source: https://www.biorxiv.org/content/10.1101/789123v1.full.pdf
